# Supplementary material
Source: PubMed Central journal article supplement (PMC6100788)
Supplement: NIHMS984896-supplement-Supplement.pdf [file NIHMS984896-supplement-Supplement.pdf]

**Cancer Cell, Volume 33**

**Supplemental Information**

**Cancer Cells Co-opt**

**the Neuronal Redox-Sensing Channel TRPA1**

**to Promote Oxidative-Stress Tolerance**

**Nobuaki Takahashi, Hsing-Yu Chen, Isaac S. Harris, Daniel G. Stover, Laura M. Selfors, Roderick T. Bronson, Thomas Deraedt, Karen Cichowski, Alana L. Welm, Yasuo Mori, Gordon B. Mills, and Joan S. Brugge**

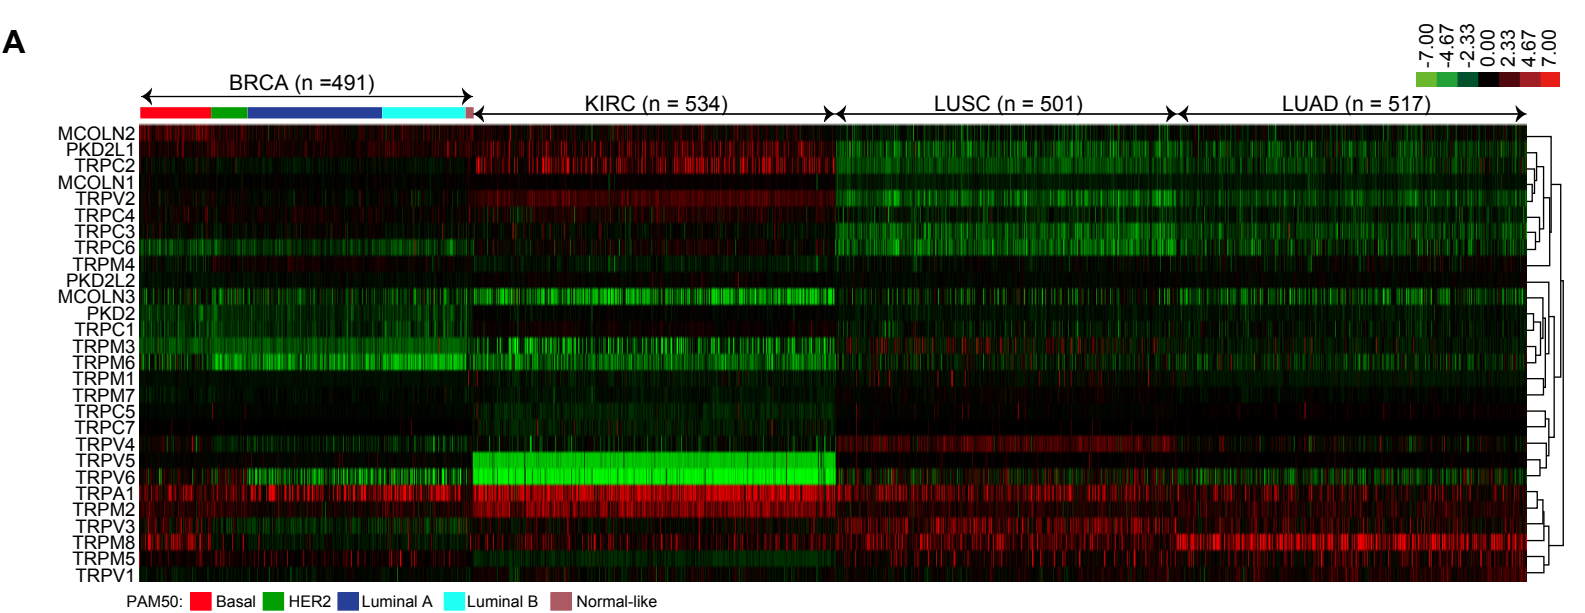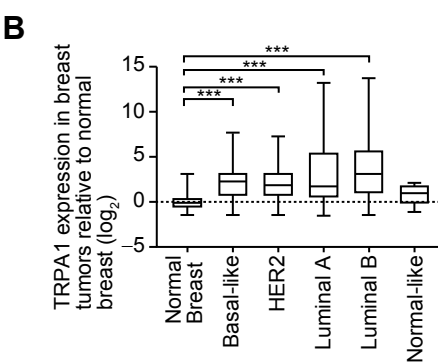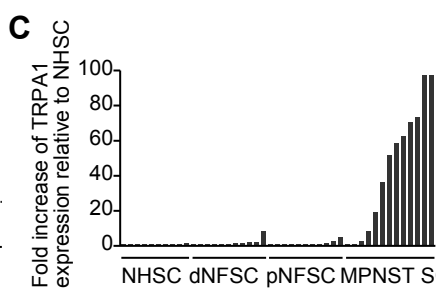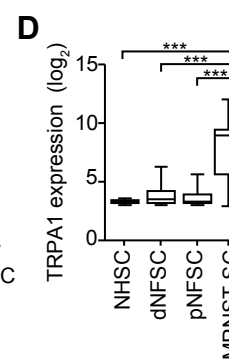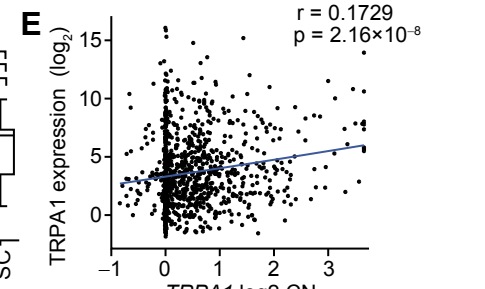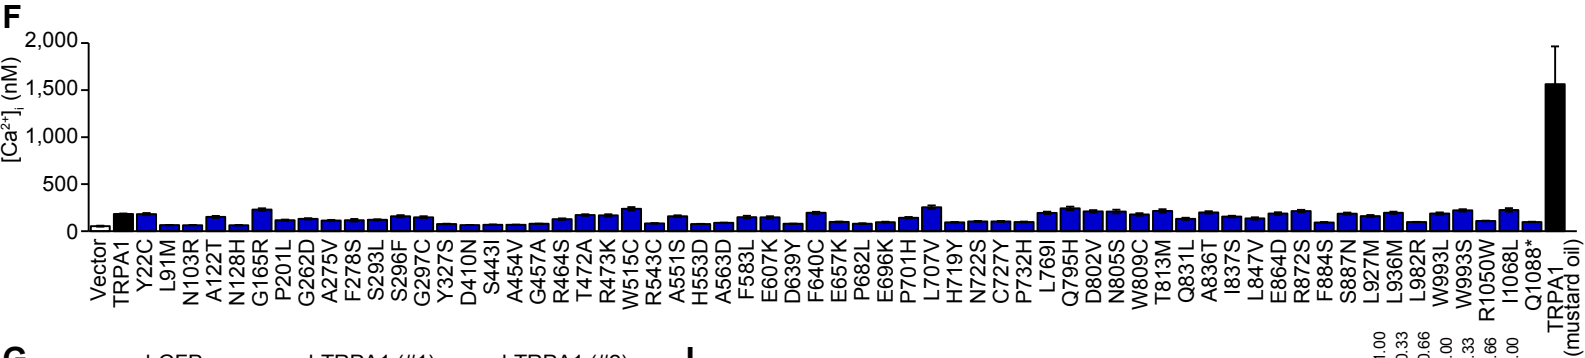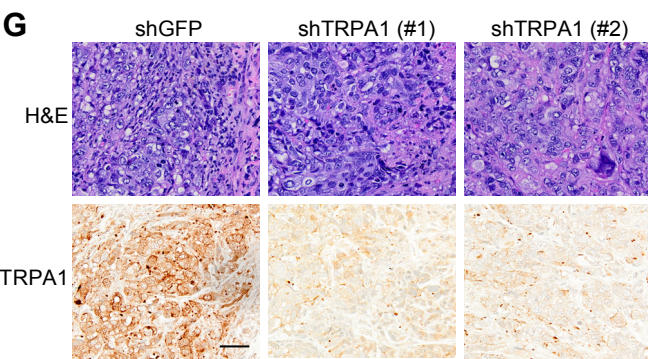

**I**

| PDX model  | HCl 001 P3 | HCl 001 P7 | HCl 002 P3 | HCl 002 P7 | HCl 003 P3 | HCl 003 P6 | HCl 004 P3 | HCl 005 P3 | HCl 006 P3 | HCl 007 P3 | HCl 008 P4 | HCl 009 P3 | HCl 009 P6 | HCl 010 P3 | HCl 011 P3 | HCl 011 P4 | HCl 012 P4 |
|------------|------------|------------|------------|------------|------------|------------|------------|------------|------------|------------|------------|------------|------------|------------|------------|------------|------------|
| ER/PR/HER2 | -/-        | -/-        | -/-        | -/-        | +/+        | +/+        | -/-        | +/+        | +/+        | +/+        | -/-        | -/-        | -/-        | -/-        | +/+        | +/+        | -/-        |
| TRPA1      | Green      | Green      | Black      | Black      | Red        | Red        | N.D.       | Green      | Green      | Green      | N.D.       | N.D.       | N.D.       | Green      | Red        | Red        | Green      |

N.D.: Not detected

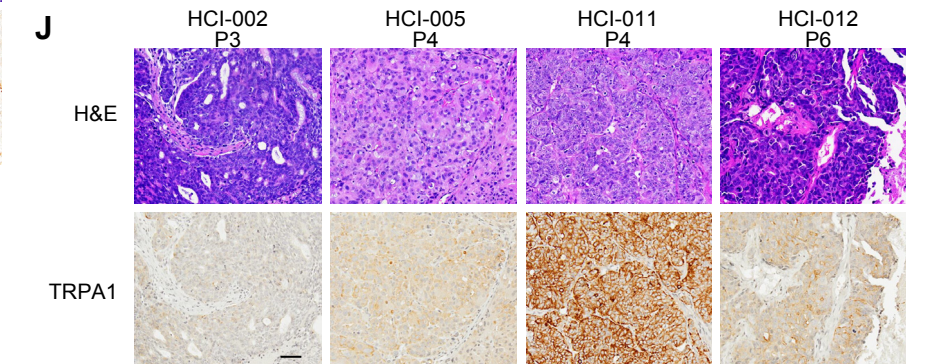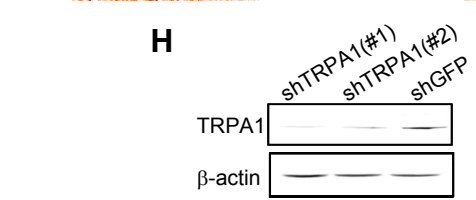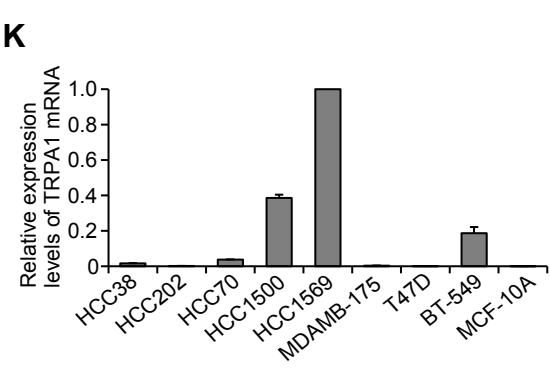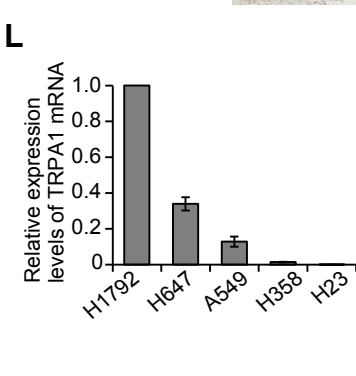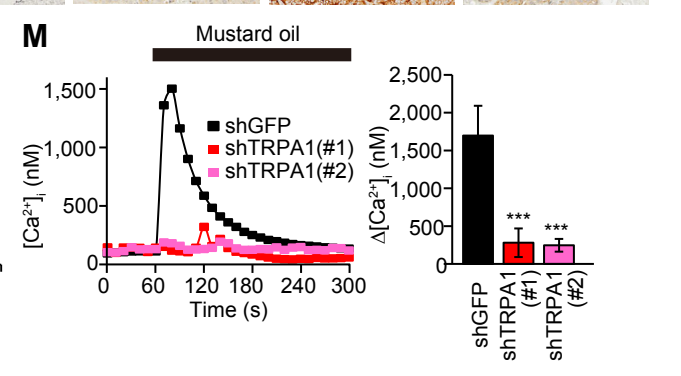

**Figure S1. TRPA1 Is Upregulated in Diverse Tumor Types, Related to Figure 1.**

(A) Heatmap (red, increased expression; green, decreased expression) of TRP channel mRNA levels in TCGA BRCA, KIRC, LUSC, and LUAD relative to corresponding normal tissues (n = 121 for BRCA, n = 72 for KIRC, n = 51 for LUSC, and n = 59 for LUAD). The samples, whose PAM50 has not been identified, are not included for BRCA. Averaged mRNA level of each TRP channel relative to corresponding normal tissues are listed in Table S1.

(B) Box plots displaying TRPA1 mRNA levels in Basal-like (n = 107), HER2 (n = 51), Luminal A (n = 201), Luminal B (n = 123), and Normal-like (n = 9) subtypes of BRCA relative to normal breast tissues (n = 121). \*\*\*p < 0.001 (one-way ANOVA).

(C) Waterfall plot displaying fold increases of TRPA1 mRNA expression in dermal and plexiform NF1-derived primary benign neurofibroma Schwann (dNFSCs and pNFSCs, respectively) and MPNST Schwann cells (MPNST SC) relative to normal human Schwann cells (NHSC), using a published microarray dataset (Miller et al., 2009). The vertical axis of the graph is cut off at 100.

(D) Box plots displaying TRPA1 mRNA levels in NHSC (n = 10), dNFSC (n = 11), pNFSC (n = 11), and MPNST SC (n = 13). \*\*\*p < 0.001 (one-way ANOVA).

(E) Correlation of *TRPA1* copy number (CN) alterations with TRPA1 mRNA expression in BRCA (n = 1036).

(F) Averaged intracellular Ca<sup>2+</sup> concentration ([Ca<sup>2+</sup>]<sub>i</sub>) upon treatment with or without 30 μM mustard oil in HEK293 cells transfected with TRPA1 mutant construct. Data shown as mean ± SEM (n = 37–208). Cancer types where each mutation was found are listed in Table S2.

(G) Representative H&E (upper panels) and TRPA1 IHC staining (lower panels) of the indicated HCC1569 xenograft tumor sections from three independent experiments. TRPA1 antibody from Sigma. Scale bar 50 μm.

(H) Immunoblot analysis of TRPA1 in HCC1569 cells transduced with shRNA against TRPA1 or GFP (control) from two independent experiments. TRPA1 antibody from Novus.

(I) Heatmap representing relative levels of TRPA1 mRNA in PDX models (DeRose et al., 2011). The data are expressed as log<sub>2</sub> median-centered ratio. P represents passage number.

(J) H&E (upper panels) and TRPA1 IHC staining (lower panels) of the indicated PDX tumor sections. Scale bar 50 μm.

(K) TRPA1 mRNA levels in the indicated breast cancer cell lines as determined by quantitative PCR. Data are normalized to HCC1569 cells. Data shown as the mean ± SEM of three independent experiments.

(L) TRPA1 mRNA levels in the indicated lung cancer cell lines as determined by quantitative PCR. Data are normalized to H1792 cells. Data shown as the mean ± SEM of three independent experiments.

(M) Averaged time courses and the maximal [Ca<sup>2+</sup>]<sub>i</sub> rises (Δ[Ca<sup>2+</sup>]<sub>i</sub>) evoked by 30 μM mustard oil in HCC1569 cells transduced with shTRPA1 or shGFP. Data shown as mean ± SEM (n = 9–59). \*\*\*p < 0.001 compared to shGFP (Student's t test).

In (B) and (D), box and whiskers graphs indicate the median and the 25<sup>th</sup> and 75<sup>th</sup> percentiles, with minimum and maximum values at the extremes of the whiskers.

**Table S1. Averaged TRP channel mRNA levels in TCGA BRCA, KIRC, LUSC, and LUAD relative to corresponding normal tissues (n = 121 for BRCA, n = 72 for KIRC, n = 51 for LUSC, and n = 59 for LUAD), related to Figure 1.**

| BRCA (n = 491) |               |                                                                  |                              |                         | KIRC (n = 534) |               |                                                                  |                              |                         |
|----------------|---------------|------------------------------------------------------------------|------------------------------|-------------------------|----------------|---------------|------------------------------------------------------------------|------------------------------|-------------------------|
| Ranking        | TRP subtype   | mRNA level relative to normal breast tissues (log <sub>2</sub> ) | p value (vs normal breast)   | p value (vs TRPA1)      | Ranking        | TRP subtype   | mRNA level relative to normal kidney tissues (log <sub>2</sub> ) | p value (vs normal lung)     | p value (vs TRPA1)      |
| 1              | <b>*TRPA1</b> | <b>2.87</b>                                                      | <b>5.03×10<sup>-22</sup></b> |                         | 1              | <b>*TRPA1</b> | <b>4.18</b>                                                      | <b>1.19×10<sup>-51</sup></b> |                         |
| 2              | MCOLN2        | 1.23                                                             | 4.87×10 <sup>-20</sup>       | 2.23×10 <sup>-27</sup>  | 2              | *TRPM2        | 3.15                                                             | 4.96×10 <sup>-76</sup>       | 1.78×10 <sup>-24</sup>  |
| 3              | PKD2L1        | 1.17                                                             | 1.26×10 <sup>-13</sup>       | 4.71×10 <sup>-31</sup>  | 3              | *TRPV2        | 2.13                                                             | 4.31×10 <sup>-80</sup>       | 3.27×10 <sup>-92</sup>  |
| 4              | *TRPM2        | 1.10                                                             | 1.39×10 <sup>-19</sup>       | 2.57×10 <sup>-32</sup>  | 4              | TRPC2         | 2.13                                                             | 2.65×10 <sup>-12</sup>       | 1.38×10 <sup>-48</sup>  |
| 5              | TRPM5         | 0.924                                                            | 6.53×10 <sup>-9</sup>        | 1.72×10 <sup>-37</sup>  | 5              | PKD2L1        | 1.62                                                             | 3.47×10 <sup>-16</sup>       | 1.07×10 <sup>-98</sup>  |
| 6              | TRPC4         | 0.505                                                            | 4.19×10 <sup>-7</sup>        | 1.16×10 <sup>-55</sup>  | 6              | TRPM8         | 1.27                                                             | 5.77×10 <sup>-6</sup>        | 1.00×10 <sup>-113</sup> |
| 7              | TRPM4         | 0.310                                                            | 2.22×10 <sup>-6</sup>        | 2.50×10 <sup>-63</sup>  | 7              | TRPC4         | 0.841                                                            | 2.03×10 <sup>-7</sup>        | 4.15×10 <sup>-165</sup> |
| 8              | TRPM8         | 0.102                                                            | 0.758                        | 3.15×10 <sup>-55</sup>  | 8              | MCOLN2        | 0.644                                                            | 1.39×10 <sup>-5</sup>        | 1.46×10 <sup>-176</sup> |
| 9              | TRPC7         | 0.0581                                                           | 0.0892                       | 1.13×10 <sup>-79</sup>  | 9              | TRPC1         | 0.515                                                            | 3.38×10 <sup>-10</sup>       | 4.44×10 <sup>-219</sup> |
| 10             | MCOLN1        | 0.0269                                                           | 0.895                        | 1.07×10 <sup>-79</sup>  | 10             | TRPC6         | 0.458                                                            | 0.000599                     | 1.06×10 <sup>-193</sup> |
| 11             | *TRPV2        | 0.0103                                                           | 0.788                        | 4.39×10 <sup>-76</sup>  | 11             | MCOLN1        | 0.342                                                            | 1.81×10 <sup>-9</sup>        | 2.36×10 <sup>-241</sup> |
| 12             | TRPV5         | -0.0186                                                          | 0.0198                       | 1.63×10 <sup>-80</sup>  | 12             | PKD2L2        | 0.181                                                            | 0.0443                       | 1.72×10 <sup>-245</sup> |
| 13             | TRPC3         | -0.0945                                                          | 0.721                        | 2.08×10 <sup>-80</sup>  | 13             | *TRPV1        | 0.154                                                            | 0.0223                       | 2.78×10 <sup>-221</sup> |
| 14             | *TRPC5        | -0.269                                                           | 6.74×10 <sup>-12</sup>       | 2.96×10 <sup>-94</sup>  | 14             | *TRPV3        | 0.116                                                            | 0.346                        | 3.74×10 <sup>-214</sup> |
| 15             | *TRPV1        | -0.330                                                           | 2.18×10 <sup>-5</sup>        | 1.95×10 <sup>-93</sup>  | 15             | PKD2          | -0.114                                                           | 0.000892                     | 5.16×10 <sup>-272</sup> |
| 16             | PKD2L2        | -0.404                                                           | 2.65×10 <sup>-10</sup>       | 1.66×10 <sup>-99</sup>  | 16             | TRPC3         | -0.200                                                           | 0.302                        | 1.83×10 <sup>-249</sup> |
| 17             | TRPC2         | -0.448                                                           | 1.49×10 <sup>-6</sup>        | 2.18×10 <sup>-98</sup>  | 17             | *TRPV4        | -0.534                                                           | 0.00209                      | 2.86×10 <sup>-258</sup> |
| 18             | *TRPM7        | -0.456                                                           | 2.33×10 <sup>-9</sup>        | 1.35×10 <sup>-101</sup> | 18             | TRPM1         | -0.683                                                           | 4.64×10 <sup>-9</sup>        | 1.24×10 <sup>-291</sup> |
| 19             | *TRPV3        | -0.577                                                           | 0.00621                      | 7.96×10 <sup>-87</sup>  | 19             | *TRPM7        | -0.743                                                           | 3.14×10 <sup>-23</sup>       | 0                       |
| 20             | TRPM1         | -0.628                                                           | 1.11×10 <sup>-34</sup>       | 4.41×10 <sup>-111</sup> | 20             | TRPC7         | -0.858                                                           | 2.09×10 <sup>-12</sup>       | 5.99×10 <sup>-291</sup> |
| 21             | *TRPV4        | -0.773                                                           | 0.00496                      | 5.21×10 <sup>-106</sup> | 21             | TRPM4         | -0.936                                                           | 4.38×10 <sup>-22</sup>       | 0                       |
| 22             | MCOLN3        | -1.23                                                            | 1.00×10 <sup>-12</sup>       | 1.58×10 <sup>-114</sup> | 22             | *TRPC5        | -1.20                                                            | 1.64×10 <sup>-29</sup>       | 0                       |
| 23             | TRPV6         | -1.56                                                            | 0.00710                      | 3.32×10 <sup>-103</sup> | 23             | TRPM5         | -1.37                                                            | 1.94×10 <sup>-58</sup>       | 0                       |
| 24             | TRPC1         | -1.59                                                            | 1.12×10 <sup>-48</sup>       | 2.88×10 <sup>-150</sup> | 24             | TRPM3         | -2.41                                                            | 1.96×10 <sup>-15</sup>       | 1.10×10 <sup>-289</sup> |
| 25             | PKD2          | -1.69                                                            | 1.11×10 <sup>-71</sup>       | 8.06×10 <sup>-159</sup> | 25             | TRPM6         | -2.82                                                            | 1.30×10 <sup>-40</sup>       | 0                       |
| 26             | TRPC6         | -1.87                                                            | 1.09×10 <sup>-57</sup>       | 2.19×10 <sup>-163</sup> | 26             | MCOLN3        | -3.30                                                            | 8.53×10 <sup>-35</sup>       | 0                       |
| 27             | TRPM3         | -2.55                                                            | 4.16×10 <sup>-117</sup>      | 7.71×10 <sup>-201</sup> | 27             | TRPV5         | -4.76                                                            | 4.85×10 <sup>-133</sup>      | 0                       |
| 28             | TRPM6         | -3.06                                                            | 1.68×10 <sup>-53</sup>       | 1.62×10 <sup>-192</sup> | 28             | TRPV6         | -6.18                                                            | 5.63×10 <sup>-158</sup>      | 0                       |

  

| LUSC (n = 501) |               |                                                                |                              |                         | LUAD (n = 517) |               |                                                                |                             |                         |
|----------------|---------------|----------------------------------------------------------------|------------------------------|-------------------------|----------------|---------------|----------------------------------------------------------------|-----------------------------|-------------------------|
| Ranking        | TRP subtype   | mRNA level relative to normal lung tissues (log <sub>2</sub> ) | p value (vs normal lung)     | p value (vs TRPA1)      | Ranking        | TRP subtype   | mRNA level relative to normal lung tissues (log <sub>2</sub> ) | p value (vs normal lung)    | p value (vs TRPA1)      |
| 1              | <b>*TRPA1</b> | <b>2.27</b>                                                    | <b>1.25×10<sup>-13</sup></b> |                         | 1              | TRPM8         | 3.90                                                           | 1.54×10 <sup>-22</sup>      | 1.69×10 <sup>-62</sup>  |
| 2              | *TRPV3        | 2.07                                                           | 2.99×10 <sup>-14</sup>       | 0.106                   | 2              | <b>*TRPA1</b> | <b>1.27</b>                                                    | <b>9.08×10<sup>-6</sup></b> |                         |
| 3              | TRPM8         | 2.01                                                           | 5.31×10 <sup>-14</sup>       | 0.0380                  | 3              | *TRPM2        | 1.20                                                           | 1.19×10 <sup>-14</sup>      | 0.49                    |
| 4              | *TRPV4        | 1.93                                                           | 7.33×10 <sup>-23</sup>       | 0.00249                 | 4              | *TRPV1        | 1.07                                                           | 5.82×10 <sup>-16</sup>      | 0.0359                  |
| 5              | *TRPM2        | 1.09                                                           | 1.28×10 <sup>-20</sup>       | 2.05×10 <sup>-26</sup>  | 5              | TRPM5         | 1.05                                                           | 3.44×10 <sup>-5</sup>       | 0.0554                  |
| 6              | TRPM5         | 0.96                                                           | 0.00212                      | 2.35×10 <sup>-24</sup>  | 6              | *TRPV3        | 0.891                                                          | 1.27×10 <sup>-6</sup>       | 0.000385                |
| 7              | *TRPV1        | 0.37                                                           | 0.0192                       | 2.61×10 <sup>-61</sup>  | 7              | *TRPC5        | 0.325                                                          | 0.465                       | 2.54×10 <sup>-27</sup>  |
| 8              | TRPV5         | 0.272                                                          | 0.138                        | 4.46×10 <sup>-76</sup>  | 8              | TRPV5         | 0.184                                                          | 0.404                       | 1.40×10 <sup>-36</sup>  |
| 9              | *TRPM7        | 0.243                                                          | 0.00302                      | 3.36×10 <sup>-76</sup>  | 9              | *TRPV4        | 0.0781                                                         | 0.562                       | 1.01×10 <sup>-30</sup>  |
| 10             | TRPC7         | 0.101                                                          | 0.0643                       | 1.51×10 <sup>-88</sup>  | 10             | TRPC7         | 0.0195                                                         | 0.197                       | 2.23×10 <sup>-48</sup>  |
| 11             | *TRPC5        | 0.0929                                                         | 0.655                        | 4.09×10 <sup>-85</sup>  | 11             | PKD2L2        | -0.0170                                                        | 0.425                       | 1.21×10 <sup>-46</sup>  |
| 12             | TRPV6         | 0.0498                                                         | 0.513                        | 2.70×10 <sup>-54</sup>  | 12             | TRPM4         | -0.0950                                                        | 0.912                       | 3.35×10 <sup>-44</sup>  |
| 13             | TRPM3         | -0.0600                                                        | 0.896                        | 9.21×10 <sup>-62</sup>  | 13             | *TRPM7        | -0.228                                                         | 0.00336                     | 3.15×10 <sup>-62</sup>  |
| 14             | TRPM1         | -0.128                                                         | 0.0220                       | 7.27×10 <sup>-84</sup>  | 14             | MCOLN2        | -0.379                                                         | 0.0375                      | 1.28×10 <sup>-56</sup>  |
| 15             | PKD2L2        | -0.207                                                         | 0.0245                       | 9.80×10 <sup>-107</sup> | 15             | TRPC1         | -0.608                                                         | 0.000134                    | 2.97×10 <sup>-77</sup>  |
| 16             | TRPM4         | -0.282                                                         | 0.135                        | 8.33×10 <sup>-104</sup> | 16             | TRPM3         | -0.742                                                         | 1.17×10 <sup>-6</sup>       | 3.64×10 <sup>-83</sup>  |
| 17             | MCOLN3        | -0.635                                                         | 0.0471                       | 1.53×10 <sup>-93</sup>  | 17             | PKD2          | -0.790                                                         | 7.06×10 <sup>-13</sup>      | 1.19×10 <sup>-99</sup>  |
| 18             | TRPC1         | -0.705                                                         | 6.79×10 <sup>-5</sup>        | 2.24×10 <sup>-120</sup> | 18             | TRPM1         | -0.821                                                         | 1.86×10 <sup>-23</sup>      | 6.83×10 <sup>-104</sup> |
| 19             | TRPM6         | -0.721                                                         | 0.000210                     | 4.65×10 <sup>-110</sup> | 19             | MCOLN1        | -0.956                                                         | 1.97×10 <sup>-31</sup>      | 2.22×10 <sup>-117</sup> |
| 20             | PKD2          | -0.772                                                         | 7.38×10 <sup>-21</sup>       | 3.32×10 <sup>-144</sup> | 20             | TRPC4         | -0.986                                                         | 1.06×10 <sup>-12</sup>      | 1.27×10 <sup>-104</sup> |
| 21             | MCOLN2        | -0.798                                                         | 4.80×10 <sup>-5</sup>        | 5.53×10 <sup>-124</sup> | 21             | TRPV6         | -1.04                                                          | 2.32×10 <sup>-5</sup>       | 3.60×10 <sup>-69</sup>  |
| 22             | TRPC4         | -1.00                                                          | 2.78×10 <sup>-9</sup>        | 9.68×10 <sup>-140</sup> | 22             | TRPM6         | -1.09                                                          | 9.44×10 <sup>-8</sup>       | 1.94×10 <sup>-90</sup>  |
| 23             | MCOLN1        | -1.11                                                          | 7.12×10 <sup>-40</sup>       | 2.55×10 <sup>-169</sup> | 23             | TRPC6         | -1.40                                                          | 9.71×10 <sup>-11</sup>      | 4.62×10 <sup>-109</sup> |
| 24             | PKD2L1        | -2.12                                                          | 2.54×10 <sup>-17</sup>       | 2.64×10 <sup>-192</sup> | 24             | TRPC2         | -1.48                                                          | 1.33×10 <sup>-15</sup>      | 1.09×10 <sup>-125</sup> |
| 25             | TRPC2         | -2.29                                                          | 1.57×10 <sup>-59</sup>       | 4.56×10 <sup>-235</sup> | 25             | PKD2L1        | -1.54                                                          | 2.08×10 <sup>-13</sup>      | 2.22×10 <sup>-123</sup> |
| 26             | TRPC3         | -2.50                                                          | 4.24×10 <sup>-48</sup>       | 2.36×10 <sup>-237</sup> | 26             | MCOLN3        | -1.68                                                          | 2.55×10 <sup>-10</sup>      | 1.19×10 <sup>-112</sup> |
| 27             | TRPC6         | -2.67                                                          | 4.36×10 <sup>-40</sup>       | 5.59×10 <sup>-235</sup> | 27             | TRPC3         | -1.88                                                          | 5.57×10 <sup>-24</sup>      | 8.20×10 <sup>-162</sup> |
| 28             | *TRPV2        | -2.67                                                          | 7.90×10 <sup>-56</sup>       | 4.75×10 <sup>-247</sup> | 28             | *TRPV2        | -1.97                                                          | 3.44×10 <sup>-47</sup>      | 7.00×10 <sup>-181</sup> |

Asterisk (\*) denotes redox-sensitive TRP channels



**Table S2. Primer sequences used for the construction of TRPA1 mutants, related to Figure 1.**

| Mutants | Cancer types         | Mutation primer sequence (5' → 3')      |                                        |
|---------|----------------------|-----------------------------------------|----------------------------------------|
|         |                      | Forward primer                          | Reverse primer                         |
| Y22C    | LUSC                 | agggcgtgttctGtgaggatgtgcc               | ggcacatcctcacagaCaacgccct              |
| L91M    | Colorectal           | cctcttggaaagtAtgcatgaaatggatg           | catccatttcatgcaTcacttccaagagg          |
| H103R   | Stomach              | gaaatacccctctgcGttgtgctgtagaaa          | tttctacagcacaacGcagaggggtatttc         |
| A122T   | Uterine              | ttctcagcagaggaAcaaaccacaacctcc          | ggaggtttgggttgTtccctctgctgagaa         |
| N128H   | Melanoma             | acccaaaccctccgaCacttcaacatgatg          | catcatgttgaagtGtcggaggtttgggt          |
| G165R   | LUSC                 | tggaggagaaaaatCgaaacacagctgtga          | tcacagctgtgttcGattttcctcca             |
| P201L   | Melanoma             | aatggggatgttccTtattaccaagctg            | cagcttgggaataAggaacatccccatt           |
| G262D   | Uterine              | tgtcctggacaatgAtgcacaatagacc            | ggctattttgtgcaTcattgtccaggcaca         |
| A275V   | GBM                  | agggaaggtgcacagTcattcattttgctg          | cagcaaatgaatgActgtgcaccttccct          |
| F278S   | Ovarian              | cagccattcattCtgcctgccacca               | tgggtggcagcaGaatgaatggctg              |
| S293L   | Colorectal           | gttaaactgatgataTgtcctattctggtagcgtg     | cagcctaccagaataggacAataatcagtttaac     |
| S296F   | BRCA                 | gttaaactgatgatactgctctattTtgtagcgtg     | cacgctaccaAaataggacgataatcagtttaac     |
| G297C   | LUAD                 | gatatcgtctattctTgtagcgtggatattgt        | aacaatatccacgctacAagaataggacgatac      |
| Y327S   | Ovarian              | catgagctagcagactCtitaattcagtgggag       | ctcccactgaaataaaGagctgctagctcatg       |
| D410N   | Colorecta & Glioma   | tggtaatggatgaaAacaacagatgggtgta         | tacaccctcgtgtTttcatccattacca           |
| S443I   | Colorectal           | cattccaaaATCaaagataagaaatcacctctgc      | gcagagggtattcttattGATttggaatg          |
| A454V   | Stomach              | gcattttgcaGTCagttatggcgatcaa            | tgatagcggcacaactGACtgcaaatgc           |
| G457A   | LUAD                 | gcagccagttatGCgctatcaataccctgt          | acaggtattgatacGCgataactggctgc          |
| R464S   | LUSC                 | caatacctgtcagAGCctctacaagacataagtg      | cacttatgtcttggaggGCTctgacaggtattg      |
| T472A   | Stomach              | gacataagtgatGCgaggtctgaaatggaag         | ccttcattcagaagcctCGCatacattatgc        |
| R473K   | Uterine              | gacataagtgatagAACcttgaatgaagtgac        | gtcaccttcattcagaagCTTcgtatcacttatgc    |
| W515C   | LUAD                 | accacaatggcTGCacagcittgcat              | atgcaaatgctGCAGccattgtggt              |
| R543C   | Melanoma             | tgaagtgcacagatTGCttggatgaagcgc          | cgtctcatccaaGCaatctgacacttca           |
| A551S   | Colorectal           | aagacgggaactTCActtcaactttgctgc          | gcagcaaatgaagTGAagttcccgctctt          |
| H553D   | LUSC                 | ggaacactgcactGACttgtctgcaagg            | ccttgcagcaaaaGTCaagtgcaagttcc          |
| A563D   | LUSC                 | ccacgcaaaaGACgttgccttctt                | aagaagcgaacGTCtttggcgtgg               |
| F583L   | Stomach              | agcagccctccCTTttgcacctg                 | gcaaggtgcaaAAGggaggcctgct              |
| E607K   | Melanoma             | caggagcaaaagatgggatAAAtgtcttaagatttc    | gaaaatctaagacaTTTatcccatcttggctcctg    |
| D639Y   | Uterine              | gcatgaaggtactttatTATtctgcatgtgcatc      | gaatgcaacatgcagaaATAaaaagttacattcgc    |
| F640C   | Uterine              | atgaaggtacttttagatTGCtgcattgtgcatc      | gaatgcaacatgcAGCAatcaaaaagttacattc     |
| E657K   | Colorectal           | gacaagctctgcccagactattatataAGTataattc   | gaaatataCTTgatataatgctcggcaggactgtc    |
| P682L   | Colorectal           | caggatgttatatagaaCTGcttacagccctcaacg    | cgttgaggcgtgtaagCAGttcatataaacatcctg   |
| E696K   | Melanoma             | caaaaataaccgcataAAGcttcaatcatcctg       | caggatgattgagaagCTTatgcccgttatttg      |
| P701H   | Stomach & Uterine    | cgcatagagcttcaatcatCATgtgtgtaagaata     | tattctttacacacATGatgattgagaagctatgcg   |
| L707V   | Uterine              | gtgtgtaagaatatCTActatgaaatgggtggc       | gccaaaccattcatgagTAGatattcttacacac     |
| H719Y   | LUAD                 | ggcttatggattagagctTATatgatgaatttaggatc  | gatcctaattcatcatATAagctctaaatcataagcc  |
| N722S   | LUSC                 | gagctcatatgatgAGTtaggatcttactgtctgg     | ccaagcagtaagatcctaaACTcatcatatgagctc   |
| C727Y   | Uterine              | gaatttaggatcttacTATcttggctcatacctatgacc | ggcataggtatgagaccaagATAgtaagatcctaattc |
| P732H   | Uterine              | gtcttggctcataCATatgaccattctggttgc       | gacaacgagaaggtgcatATGtatgacccaagac     |
| L769I   | Uterine              | ctagataaccagaattcatalATAataaaaactgtatg  | catacaagttttatTATatataaactggttatctag   |
| Q795H   | Uterine              | cggggcaaaatttccaaCACaaaaggaattatt       | aataattccttttGTGttgaaaatttgcctccg      |
| D802V   | LUAD                 | ggaattattttatgGTTataagcaatgttctgaaatg   | ccattcaagaacattgcttatAACcataaaaataattc |
| N805S   | LUAD                 | tatggatataagcAGTgttctgaaatgattatctcac   | gtgtagataatcattcaagaacACTGcttatatccata |
| W809C   | GBM                  | atataagcaatgttcttgaaTGCattatctacacgacg  | cgtcgtgtagataatGCAttcaagaacattgcttat   |
| T813M   | GBM                  | gaatggattatctacATGacgggcatcattttgt      | acaaaatgatgcccgCATgtagataatccattc      |
| Q831L   | GBM                  | agctcatctgCTGtggcaatgtgga               | tccacattgccaCAGcagatgagct              |
| A836T   | LUAD & Pancreas      | tggcaatgtggaACaattgctgttacttct          | agaagtaaacagcaatGTtccacattgcca         |
| I837S   | Colorectal           | tggcaatgtggaACaattgctgttacttct          | agaagtaaacagcACTgtctccacattgcca        |
| L847V   | Uterine              | cttctattggatgaattcGTAttgtatctcaagatt    | aatctttgagatataaTACGaaattcatccaatgaga  |
| E864D   | Uterine              | ggaattttattggtatgtgGACgtaattttgaaac     | gltttcaaaattacGTCcaacataacaataaaaattcc |
| R872S   | Glioma               | tgaaaacttggtagcTctacagttgattatcttcc     | ggaagataaatacaactgtagaGCTcaacaagttttca |
| F884S   | Stomach              | ccttctctggctTCTggactcagcttttaca         | tgtaaaagctgagtcAGAagccagaagaagg        |
| S887N   | Colorectal           | ttctggctttggactAACttttacatctcct         | aggaggatgtaaaaGTTgagttcaaaagccagaa     |
| L927M   | Uterine & Colorectal | tctagaaccatataTGagaatgaattggcac         | gtgccaaattcattctCATatattggtctagga      |
| L936M   | Colorectal           | ggcacatccagttATGtctttgcacaac            | gttgtgcaagggaCATaactggatgtgccc         |
| L982R   | Stomach              | ctatgcaggtggaacCGTcataccagctta          | taagctggtatgACGttccacctgcatag          |
| W993L   | GBM & NSCLC          | gaagctgcccactTTGtttctacgcaaaagt         | actttgcgtagaaaCAaaagtggcagcttc         |
| W993S   | LUSC                 | gaagctgcccactTCGtttctacgcaaaagt         | actttgcgtagaaaCAaaagtggcagcttc         |
| R1050W  | Uterine              | taagcagaataacTGGctgaaagatcttactttc      | gaaaagtaagatcctcagCCAGtatgttctgcttta   |
| I1068L  | LUAD                 | gagctcattaaactgCTCattcagaagatgg         | ccatcttctgaatGAGcagtttaagatgctc        |
| Q1088*  | LUSC                 | gccattgtcttttTAAGacaggttaagaaagacg      | gctctttctaaacctgtcTTAaaaagaacaatggc    |

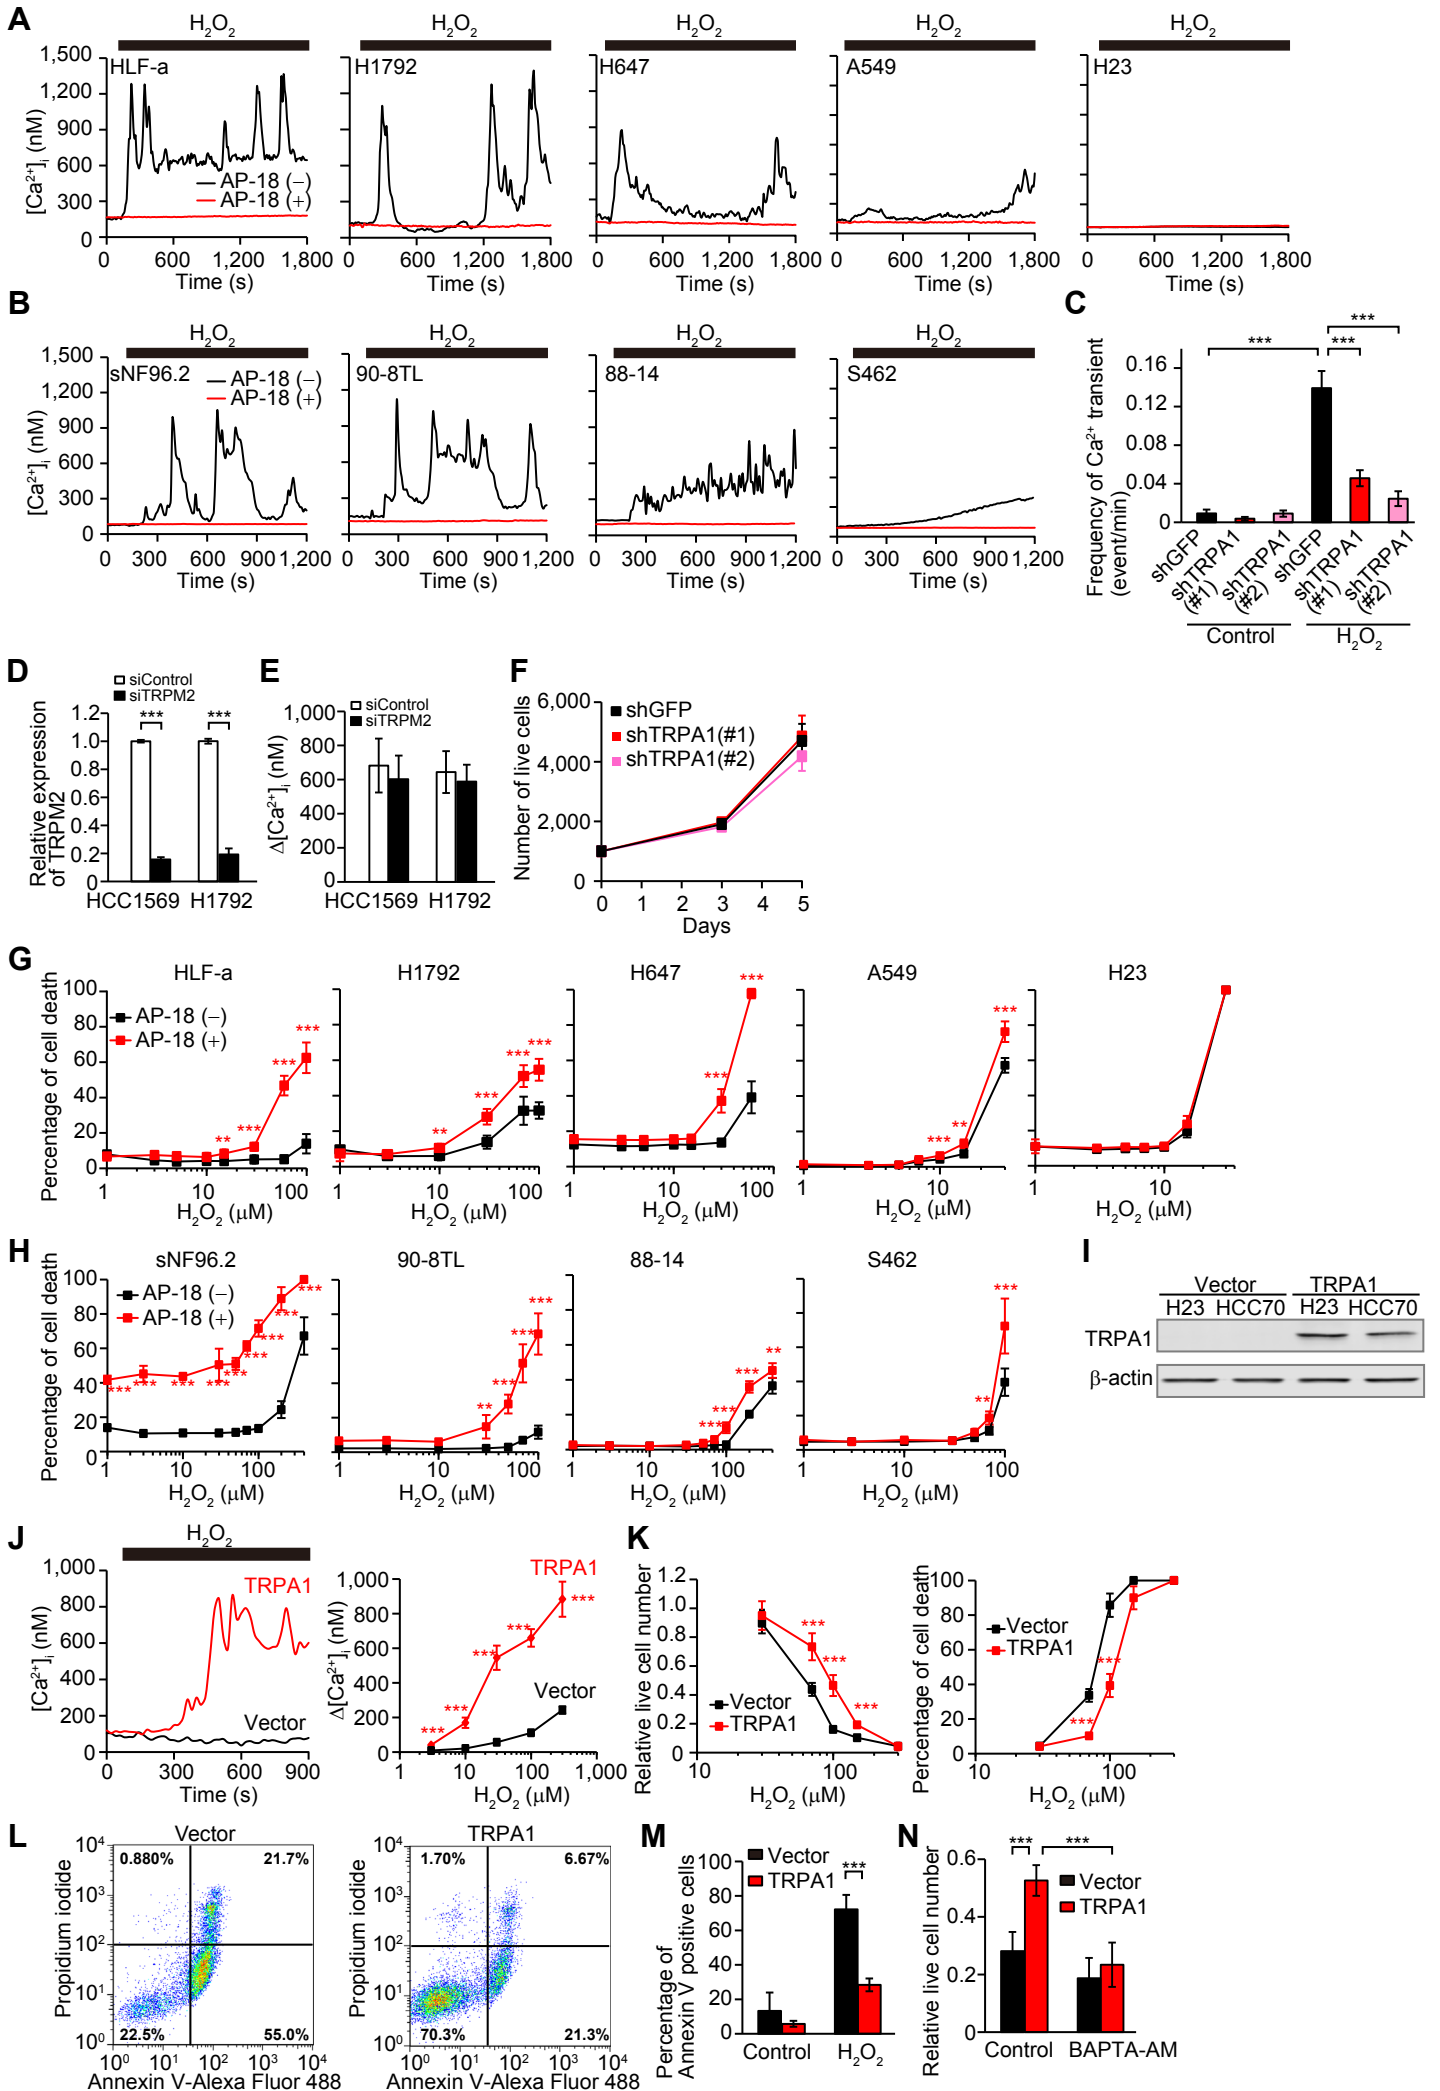

**Figure S2. Ca<sup>2+</sup> Influx through TRPA1 Suppresses Cell Death under Oxidative Stress, Related to Figure 2.**

**(A and B)** Representative time courses of [Ca<sup>2+</sup>]<sub>i</sub> changes in the indicated lung cancer (A) or MPNST cells (B) upon treatment with 10 μM H<sub>2</sub>O<sub>2</sub> (A) or 30 μM H<sub>2</sub>O<sub>2</sub> (B) in the presence or absence of 10 μM AP-18.

**(C)** Frequency of Ca<sup>2+</sup> transient ( $\Delta$ [Ca<sup>2+</sup>]<sub>i</sub> > 200 nM) in HCC1569 cells transduced with shTRPA1 or shGFP and treated with or without 10 μM H<sub>2</sub>O<sub>2</sub>. Data shown as mean ± SEM (n = 35–150). \*\*\*p < 0.001 (one-way ANOVA).

**(D)** mRNA expression of TRPM2 in HCC1569 and H1792 cells transfected with siControl or siTRPM2. Data were normalized to siControl cells. Data shown as mean ± SD of three independent experiments. \*\*\*p < 0.001 (Student' s t test).

**(E)**  $\Delta$ [Ca<sup>2+</sup>]<sub>i</sub> evoked by 10 μM H<sub>2</sub>O<sub>2</sub> in the indicated cell lines. Data shown as mean ± SEM (n = 28–34).

**(F)** Live cell numbers in HCC1569 cells transduced with shTRPA1 or shGFP for the indicated times. Data shown as mean ± SD from the sum of three independent experiments performed in duplicate.

**(G and H)** Percentage of cell death in the indicated lung cancer (G) and MPNST cells (H) upon treatment with H<sub>2</sub>O<sub>2</sub> for 72 hr in the presence or absence of 10 μM AP-18. Data shown as mean ± SD from the sum of three independent experiments performed in duplicate. \*\*p < 0.01 and \*\*\*p < 0.001 compared to vehicle control for AP-18 [AP-18 (-)] (Student' s t test).

**(I)** Immunoblot of lysates from H23 or HCC70 cells transduced with an empty lentiviral vector or TRPA1 from two independent experiments.

**(J)** Representative time course of [Ca<sup>2+</sup>]<sub>i</sub> rises evoked by 100 μM H<sub>2</sub>O<sub>2</sub> and dose-response of  $\Delta$ [Ca<sup>2+</sup>]<sub>i</sub> elicited upon treatment with increasing concentrations of H<sub>2</sub>O<sub>2</sub> in MCF-10A cells transduced with an empty lentiviral vector or TRPA1. Data shown as mean ± SEM (n = 58–167). \*\*\*p < 0.001 compared to vector (Student' s t test).

**(K)** Live cell numbers relative to H<sub>2</sub>O<sub>2</sub>-untreated cells and percentage of cell death in the indicated MCF-10A cells upon treatment with H<sub>2</sub>O<sub>2</sub> for 72 hr in EGF-free conditions. Data shown as mean ± SD from the sum of three independent experiments performed in duplicate. \*\*\*p < 0.001 compared to vector (Student' s t test).

**(L)** Representative flow cytometric plots of the indicated MCF-10A cells treated with 70 μM H<sub>2</sub>O<sub>2</sub> for 72 hr.

**(M)** Percentage of annexin V-positive cells from experiment in (L). Data shown as mean ± SD of three independent experiments. \*\*\*p < 0.001 (Student' s t test).

**(N)** Live cell numbers relative to H<sub>2</sub>O<sub>2</sub>-untreated cells in the indicated MCF-10A cells treated with 100 μM H<sub>2</sub>O<sub>2</sub> in the presence or absence of 10 μM BAPTA-AM. Data shown as mean ± SD from the sum of two independent experiments performed in triplicate. \*\*\*p < 0.001 (one-way ANOVA).

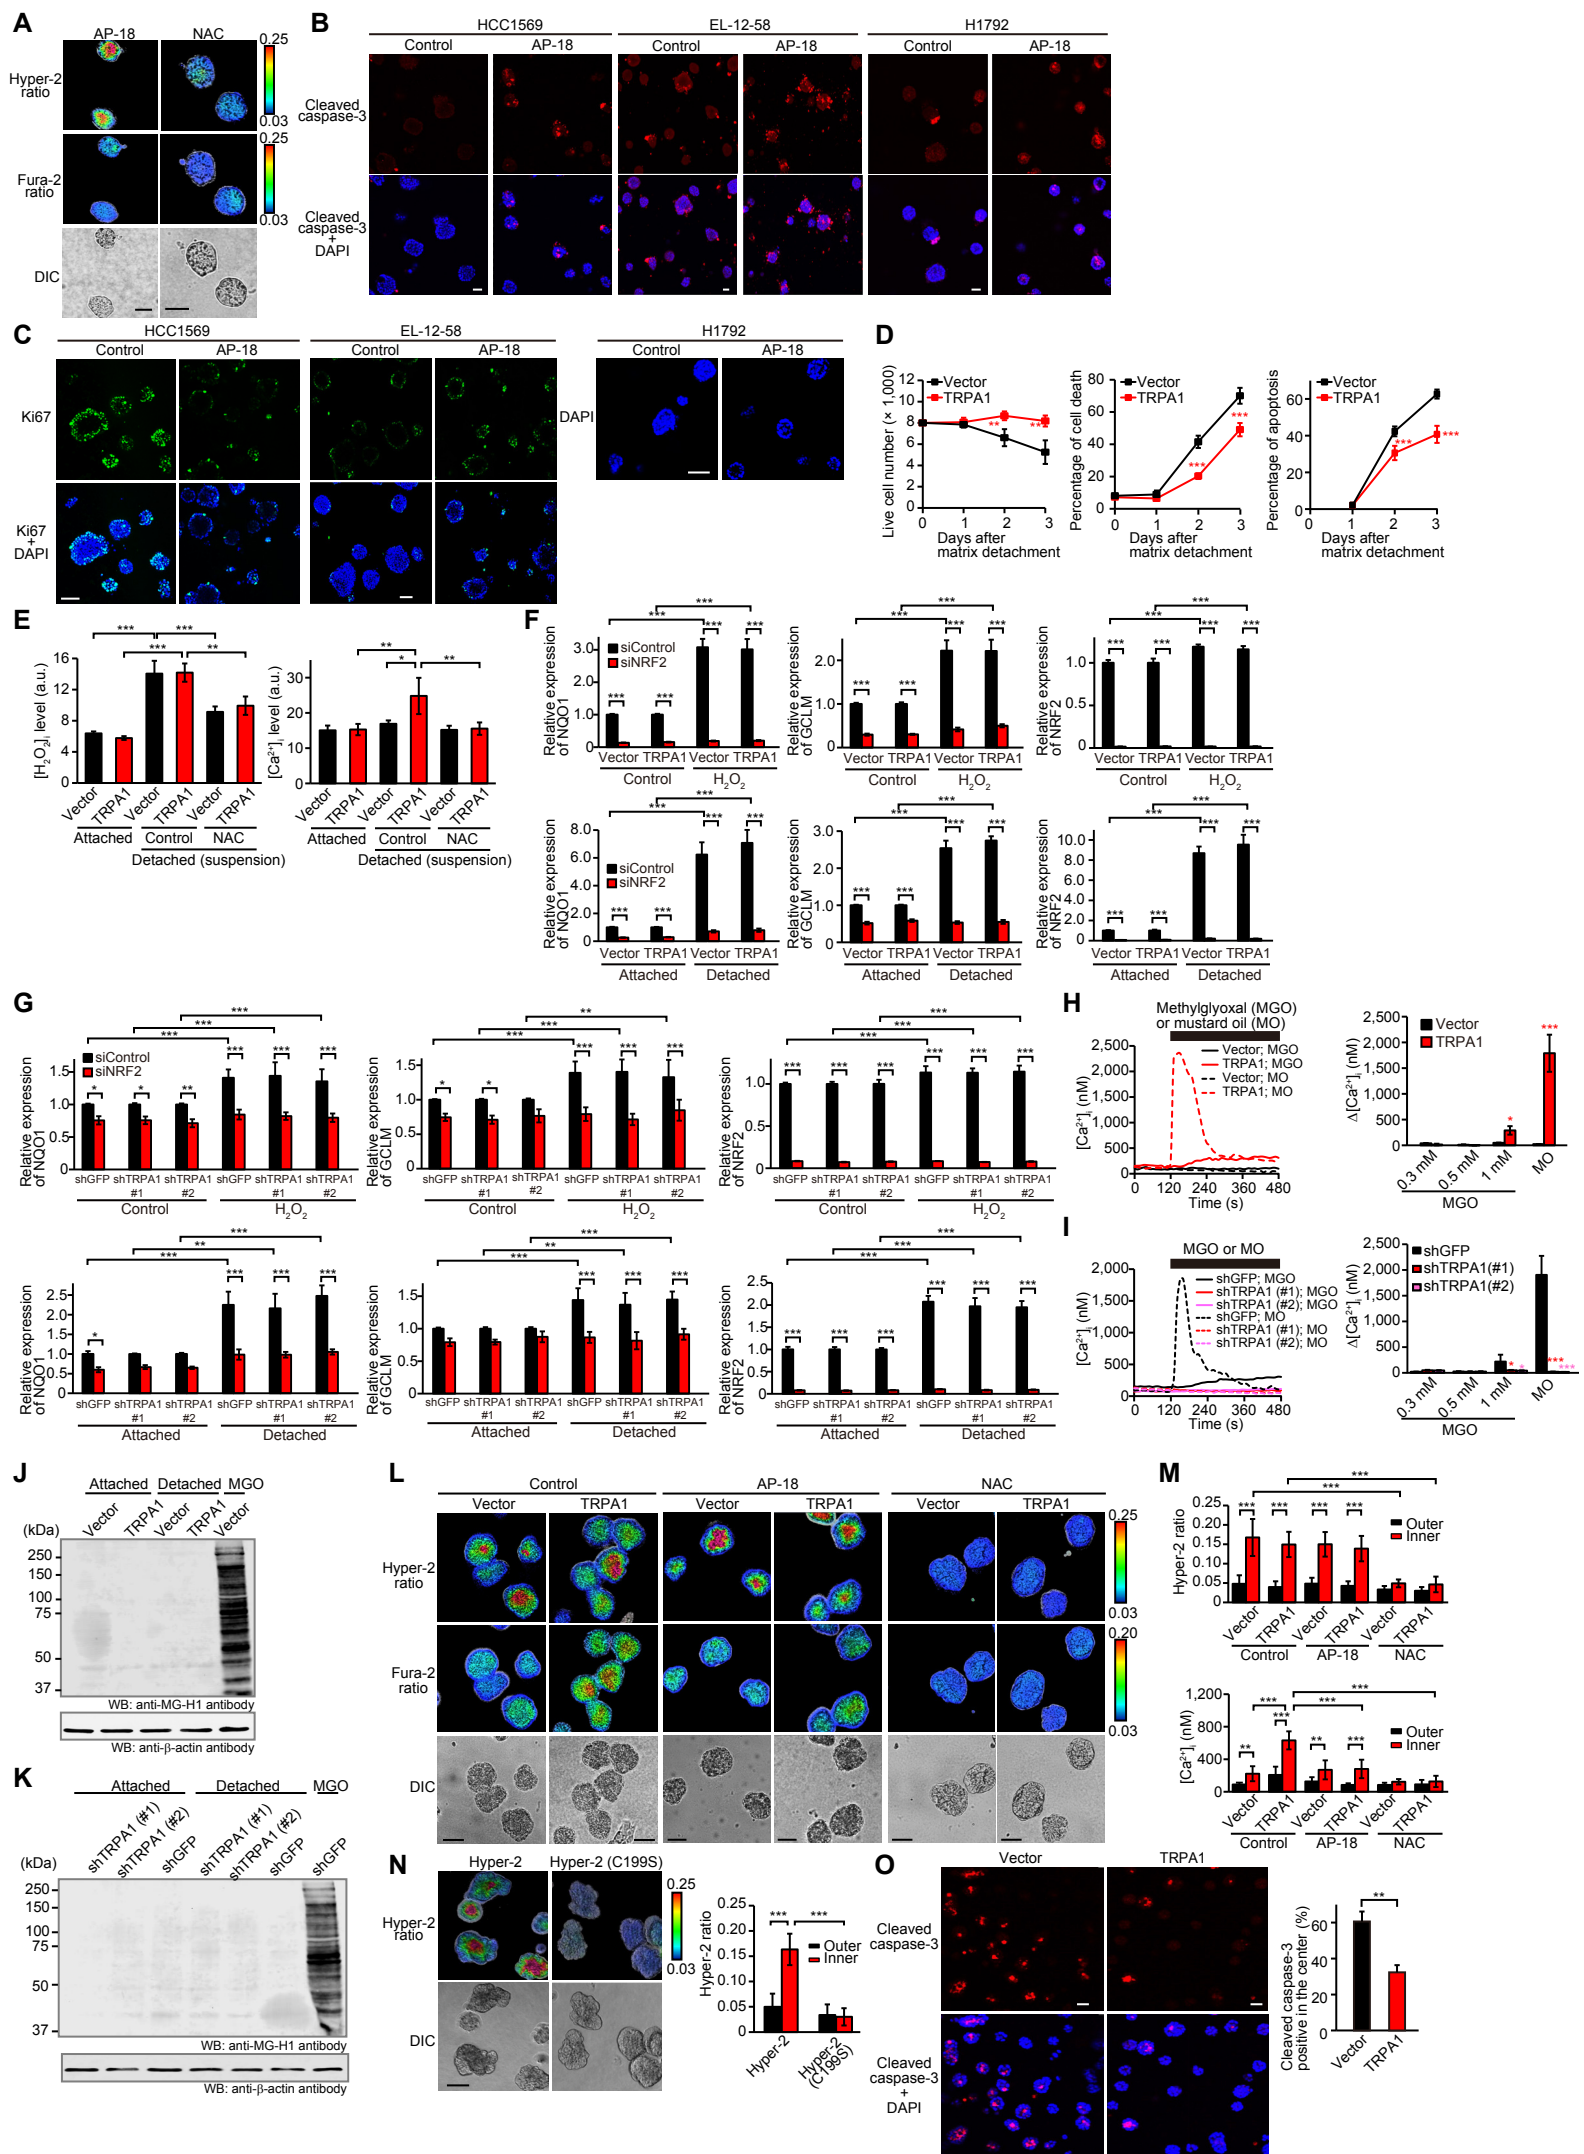

**Figure S3. TRPA1 Induces Ca<sup>2+</sup> Influx in Response to ROS Produced upon Matrix Dissociation and Suppresses Anoikis, Related to Figure 3.**

(A) Representative Hyper-2 and fura-2 ratio images of day-5 HCC1569 spheroids transduced with shGFP upon treatment with 10  $\mu$ M AP-18 or 5 mM NAC (pH was adjusted to 7.4). Scale bar 50  $\mu$ m.

(B) Representative images of day-10 HCC1569, day-10 EL-12-58, or day-6 H1792 spheroids treated with or without 10  $\mu$ M AP-18. The spheroids were stained with cleaved caspase-3 and DAPI. Scale bar 50  $\mu$ m.

(C) Representative images of day-15 HCC1569, day-15 EL-12-58, or day-10 H1792 spheroids treated with or without 10  $\mu$ M AP-18. The spheroids were stained with Ki67 and/or DAPI. Scale bar 100  $\mu$ m.

(D) Live cell number, percentage of cell death, and percentage of apoptosis in the indicated MCF-10A cells after matrix detachment for the indicated time. Data shown as mean  $\pm$  SD of four independent experiments. \*\* $p < 0.01$  and \*\*\* $p < 0.001$  compared to vector (Student's  $t$  test).

(E) Intracellular H<sub>2</sub>O<sub>2</sub> and Ca<sup>2+</sup> levels as determined by peroxy green-1 and Fluo-4 staining, respectively, in MCF-10A cells with an empty lentiviral vector or TRPA1 24 hr after plating in adherent or non-adherent plates. Cells were treated with or without 1 mM NAC. Data shown as mean  $\pm$  SD of three independent experiments. \* $p < 0.05$ , \*\* $p < 0.01$ , and \*\*\* $p < 0.001$  (one-way ANOVA).

(F and G) mRNA expression of NQO1, GCLM, or NRF2 in the indicated MCF-10A (F) or HCC1569 cells (G) treated with or without 20  $\mu$ M H<sub>2</sub>O<sub>2</sub> or cultured in adherent (attached) or non-adherent plates (detached) for 24 hr. Data were normalized to siControl cells treated with vehicle control for H<sub>2</sub>O<sub>2</sub>. Data shown as mean  $\pm$  SD of four independent experiments. \* $p < 0.05$ , \*\* $p < 0.01$ , and \*\*\* $p < 0.001$  (one-way ANOVA).

(H and I) Representative time courses of [Ca<sup>2+</sup>]<sub>i</sub> rises evoked by 1 mM methylglyoxal (MGO) or 30  $\mu$ M mustard oil (MO), dose-response of  $\Delta$ [Ca<sup>2+</sup>]<sub>i</sub> elicited upon treatment with increasing concentrations of MGO, and  $\Delta$ [Ca<sup>2+</sup>]<sub>i</sub> evoked by 30  $\mu$ M MO in the indicated MCF-10A (H) or HCC1569 cells (I). Data shown as mean  $\pm$  SEM (n = 8–39). \* $p < 0.05$  and \*\*\* $p < 0.001$  compared to vector in (H) or shGFP in (I) (Student's  $t$  test).

(J and K) Methylglyoxal adducts detected by immunoblotting using anti-MG-H1 antibody in the indicated MCF-10A (J) or HCC1569 cells (K) 24 hr after plating in adherent (attached) or non-adherent plates (detached) or treated with 1 mM MGO for 12 hr. Data from two independent experiments.

(L) Representative Hyper-2 and fura-2 ratio images of day-6 MCF-10A acini transduced with vector or TRPA1 and treated with 10  $\mu$ M AP-18 or 5 mM NAC (pH was adjusted to 7.4). Scale bar 50  $\mu$ m.

(M) Averaged Hyper-2 ratio and [Ca<sup>2+</sup>]<sub>i</sub> in the inner and outer region of the indicated day-6 MCF-10A acini. The acini were treated with or without 10  $\mu$ M AP-18 or 5 mM NAC (pH was adjusted to 7.4). Data shown as mean  $\pm$  SD (n = 5–13). \*\* $p < 0.01$  and \*\*\* $p < 0.001$  (one-way ANOVA).

(N) Representative Hyper-2 and Hyper-2 (C199S) ratio images of day-6 MCF-10A acini and averaged ratio in the inner and outer region of the acini. Scale bar 50  $\mu$ m. Data shown as mean  $\pm$  SD (n = 7–11). \*\*\* $p < 0.001$  (one-way ANOVA).

(O) Representative images of day-8 TRPA1- or vector-transduced MCF-10A acini stained with cleaved caspase-3 and percentage of acini with cleaved caspase-3-positive staining in the center. Scale bar 50  $\mu$ m. Data shown as mean  $\pm$  SEM of five independent experiments. \*\* $p < 0.01$  (Student's  $t$  test).



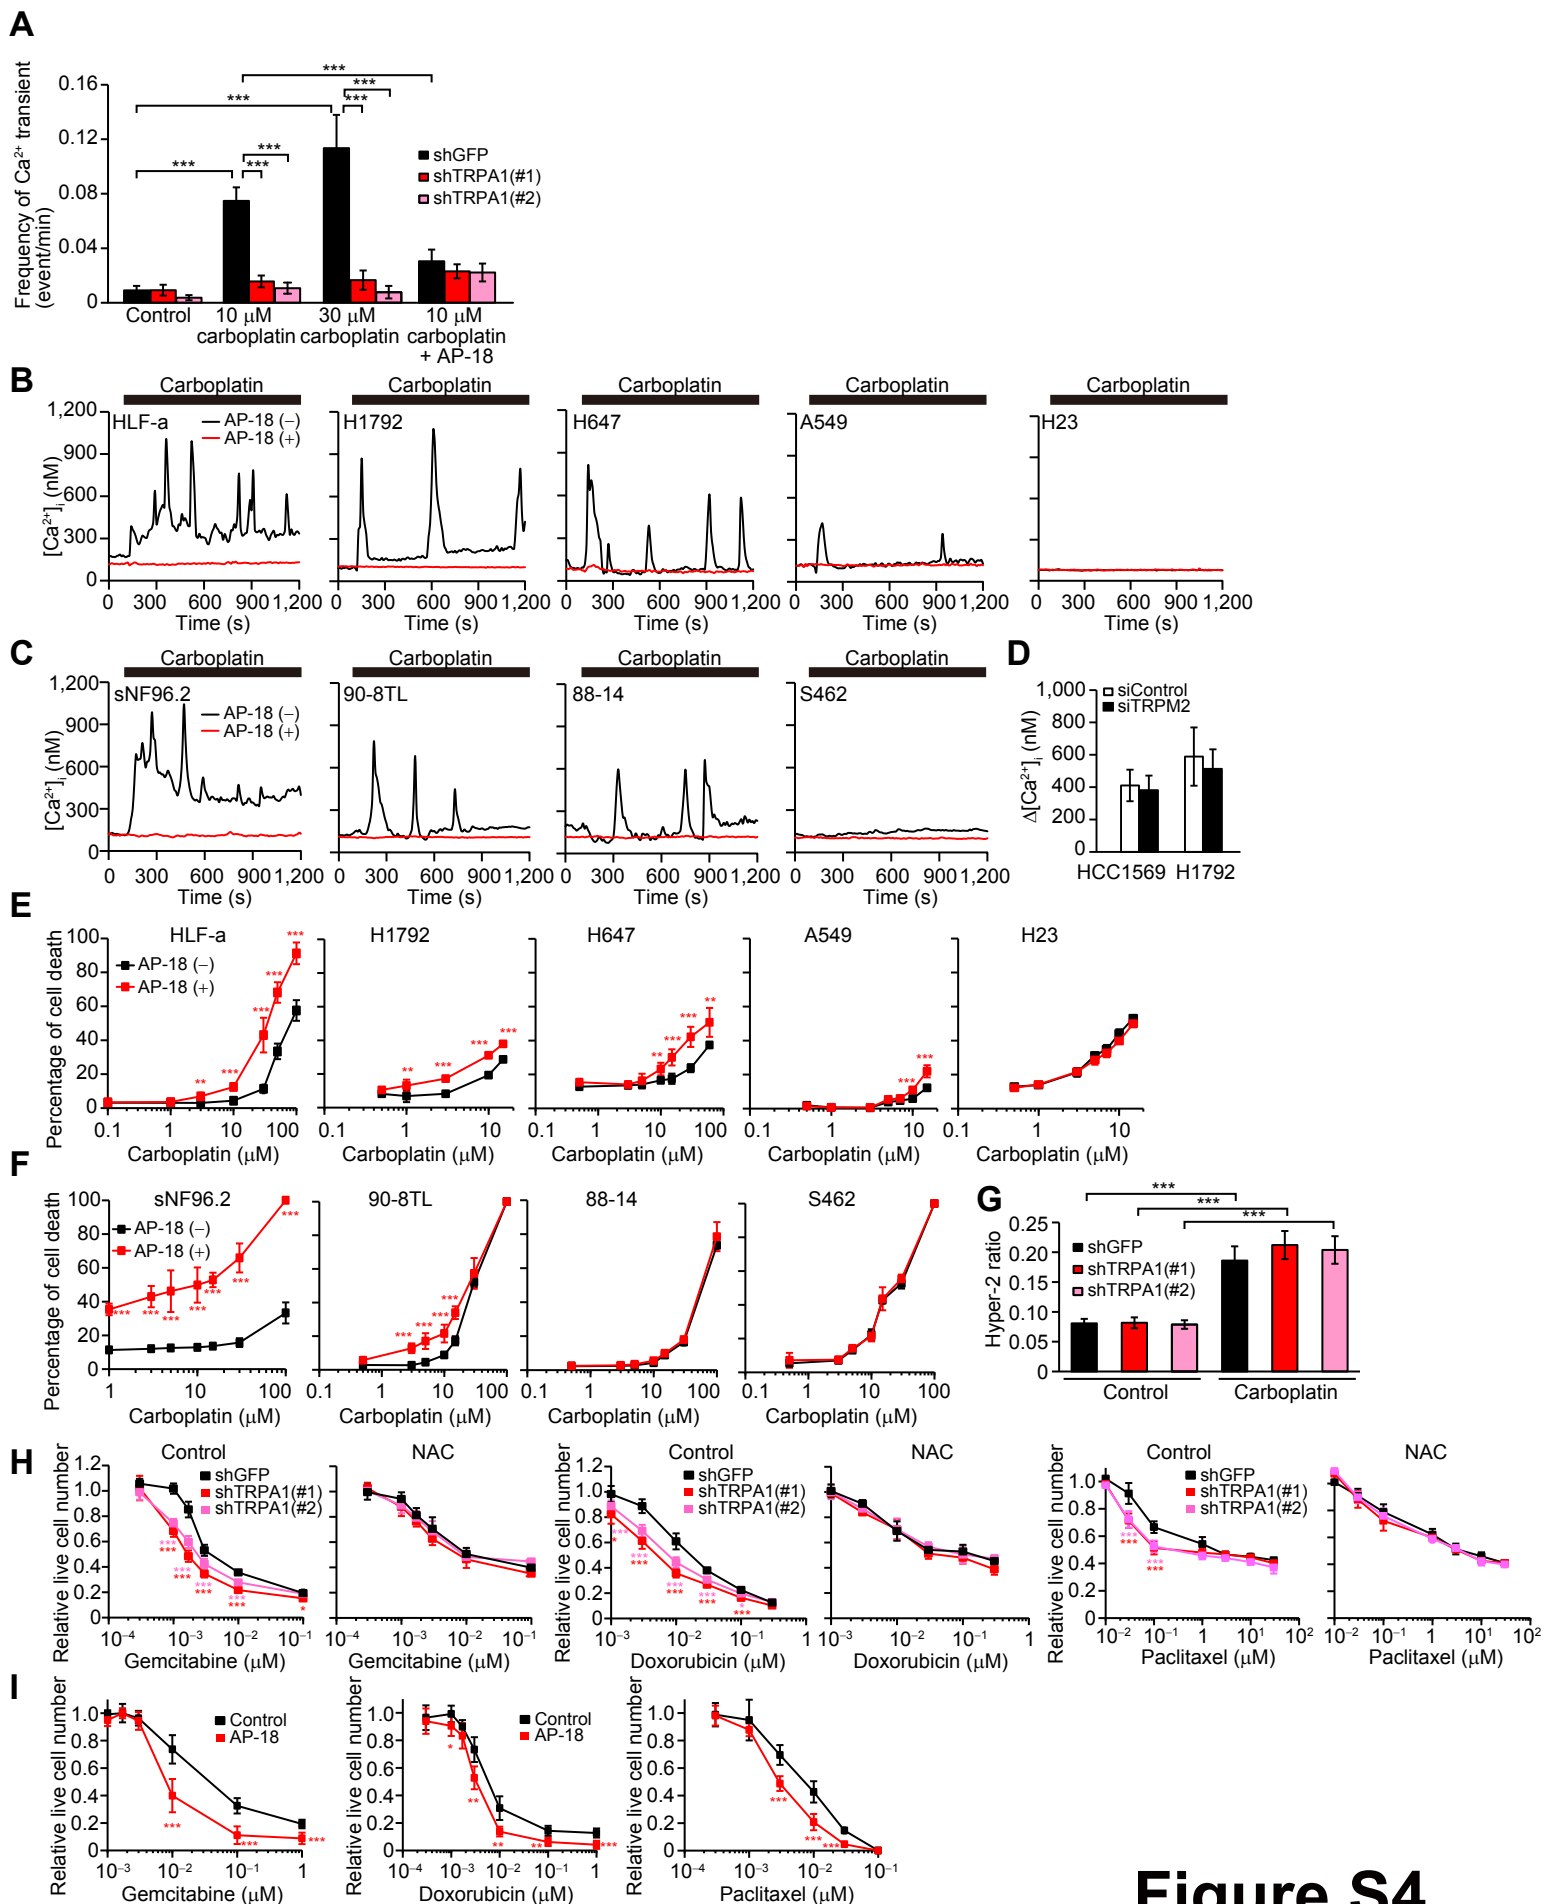

**Figure S4**

**Figure S4. Ca<sup>2+</sup> Influx through TRPA1 Suppresses Cell Death under Chemotherapy Treatment without Affecting Cellular Redox Status, Related to Figure 4.**

**(A)** Frequency of Ca<sup>2+</sup> transient ( $\Delta[\text{Ca}^{2+}]_i > 200 \text{ nM}$ ) in HCC1569 cells transduced with shRNA against TRPA1 or GFP and treated with or without carboplatin in the presence or absence of 10  $\mu\text{M}$  AP-18. Data shown as mean  $\pm$  SEM (n = 34–151). \*\*\*p < 0.001 (one-way ANOVA).

**(B and C)** Representative time courses of  $[\text{Ca}^{2+}]_i$  changes in the indicated lung cancer (B) and MPNST cells (C) upon treatment with 10  $\mu\text{M}$  carboplatin in the presence or absence of 10  $\mu\text{M}$  AP-18.

**(D)**  $\Delta[\text{Ca}^{2+}]_i$  evoked by 10  $\mu\text{M}$  carboplatin in HCC1569 or H1792 cells transfected with siControl or siTRPM2. Data shown as mean  $\pm$  SEM (n = 24–31). The effect of siTRPM2 on TRPM2 mRNA expression was shown in Figure S2D.

**(E and F)** Percentage of cell death in the indicated lung cancer (E) and MPNST cells (F) upon treatment with carboplatin for 72 hr in the presence or absence of 10  $\mu\text{M}$  AP-18. Data shown as mean  $\pm$  SD from the sum of three independent experiments performed in duplicate. \*\*p < 0.01 and \*\*\*p < 0.001 compared to AP-18 (–) (Student's t test).

**(G)** Averaged Hyper-2 ratio in the indicated HCC1569 cells treated with or without 30  $\mu\text{M}$  carboplatin for 48 hr. Data shown as mean  $\pm$  SEM (n = 106–233). \*\*\*p < 0.001 (one-way ANOVA).

**(H)** Live cell numbers relative to chemotherapy-untreated cells in the indicated HCC1569 cells treated with gemcitabine, doxorubicin, or paclitaxel in the presence or absence of 5 mM NAC (pH was adjusted to 7.4) for 72 hr. Data shown as mean  $\pm$  SD from the sum of two or three independent experiments performed in duplicate. \*p < 0.05 and \*\*\*p < 0.001 compared to shGFP (Student's t test).

**(I)** Live cell numbers relative to chemotherapy-untreated cells in H1792 cells treated with gemcitabine, doxorubicin, or paclitaxel in the presence or absence of 10  $\mu\text{M}$  AP-18 for 72 hr. Data shown as mean  $\pm$  SD from the sum of three independent experiments performed in duplicate. \*p < 0.05, \*\*p < 0.01, and \*\*\*p < 0.001 compared to vehicle control for AP-18 (Student's t test).

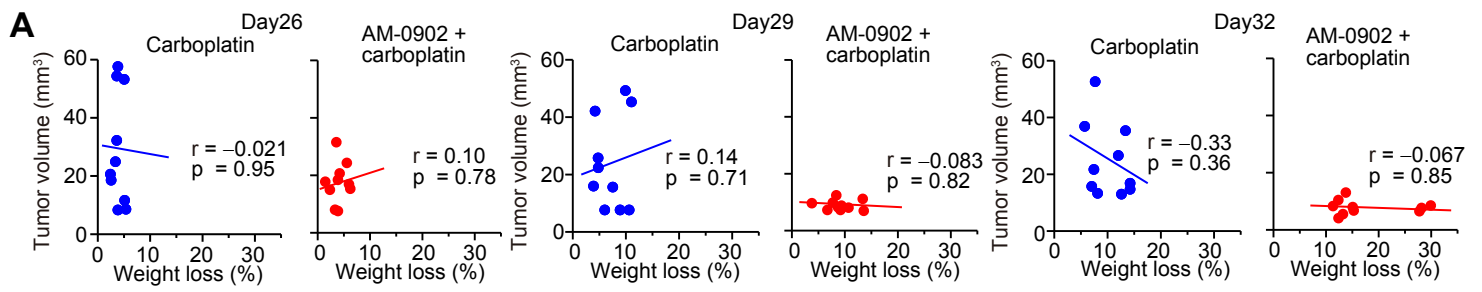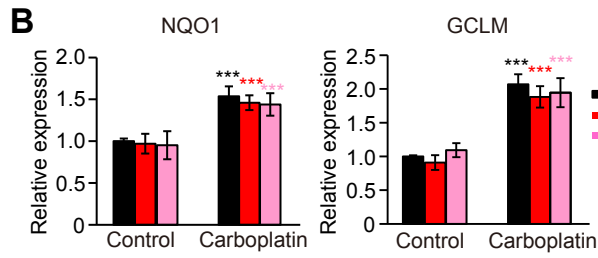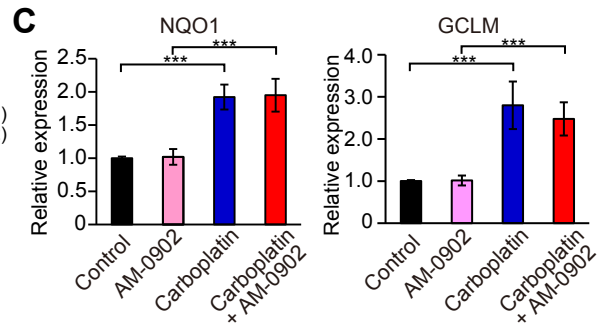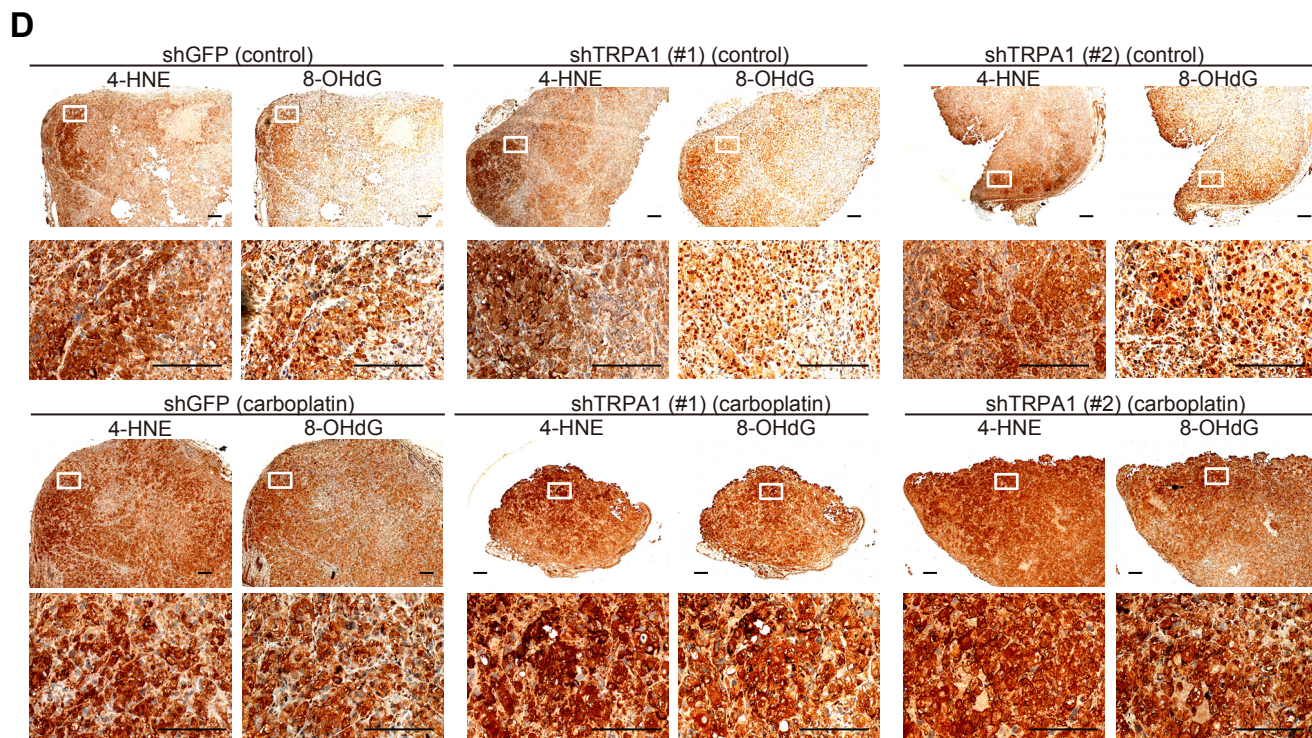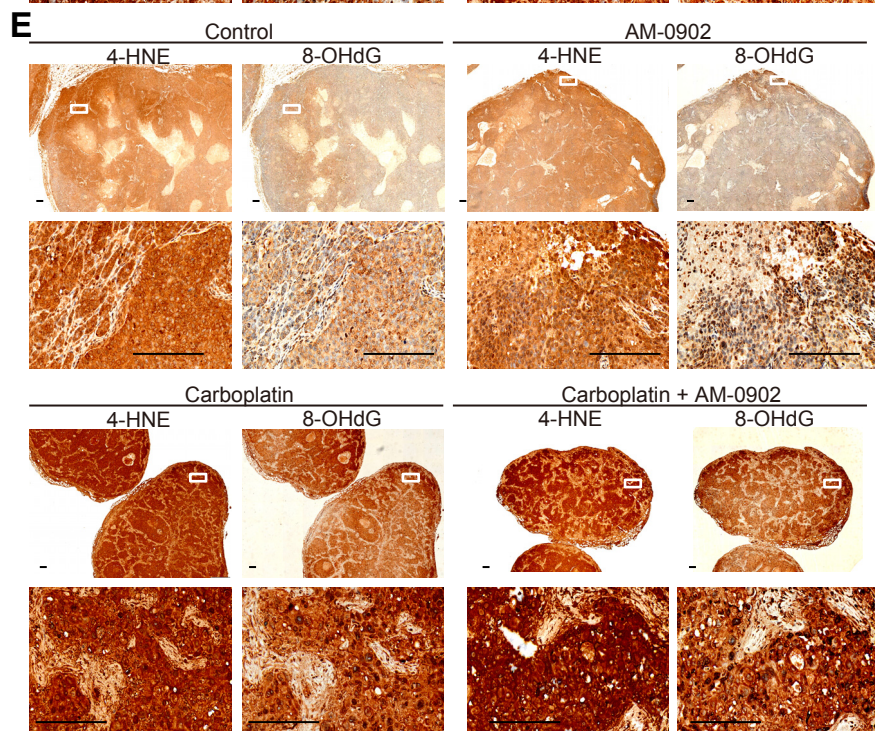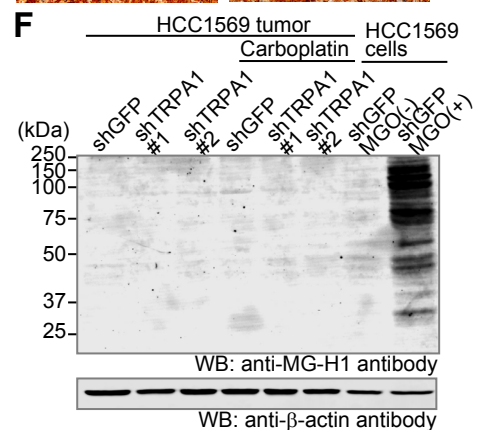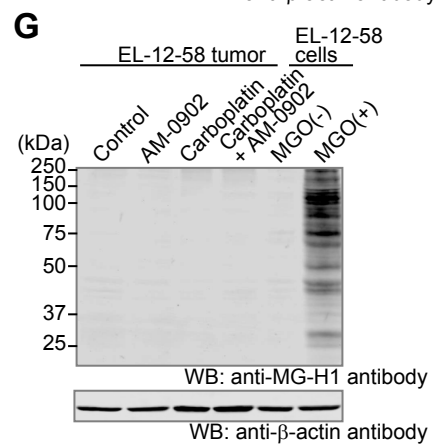

**Figure S5. HCC1569 and EL-12-58 Tumors Are Exposed to Oxidative Stress but Not Dicarbonyl Stress, Related to Figure 5.**

**(A)** Correlation of weight loss (%) with tumor volume ( $\text{mm}^3$ ) in EL-12-58 xenograft tumors treated with carboplatin ( $n = 10$ ) or AM-0902 + carboplatin ( $n = 10$ ) at the indicated time points. Averaged weight loss: day 26,  $3.94 \pm 1.02\%$  for carboplatin and  $4.20 \pm 1.52\%$  for carboplatin + AM-0902; day 29,  $7.01 \pm 2.80\%$  for carboplatin and  $9.07 \pm 2.94\%$  for carboplatin + AM-0902; day 32,  $10.3 \pm 3.36\%$  for carboplatin and  $17.6 \pm 7.45\%$  for carboplatin + AM-0902. Data shown as mean  $\pm$  SD.

**(B)** mRNA expression of NQO1 or GCLM in the indicated HCC1569 tumors. Tumors were resected from mice in Figure 5A at the end point. Data were normalized to vehicle control. Data shown as mean  $\pm$  SD of four independent experiments. \*\*\* $p < 0.001$  compared to vehicle control (one-way ANOVA).

**(C)** mRNA expression of NQO1 or GCLM in the indicated EL-12-58 tumors. Tumors were resected from mice in Figure 5D at the end point. Data were normalized to vehicle control. Data shown as mean  $\pm$  SD of four independent experiments. \*\*\* $p < 0.001$  (one-way ANOVA).

**(D and E)** Representative images of 4-HNE or 8-OHdG IHC in HCC1569 (D) or EL-12-58 tumor sections (E). Tumors were resected from mice in Figure 5A for HCC1569 tumors or Figure 5D for EL-12-58 tumors at the end point. Enlarged views of the boxed regions shown in lower panel. Scale bar 200  $\mu\text{m}$ .

**(F)** Methylglyoxal adducts detected by immunoblotting using anti-MG-H1 antibody in the indicated HCC1569 tumors or cells. Tumors were resected from mice in Figure 5A at the end point. Cells were treated with or without 1 mM MGO for 12 hr. Data from two independent experiments.

**(G)** Methylglyoxal adducts detected by immunoblotting using anti-MG-H1 antibody in the indicated EL-12-58 tumors or cells. Tumors were resected from mice in Figure 5D at the end point. Cells were treated with or without 1 mM MGO for 12 hr. Data from two independent experiments.



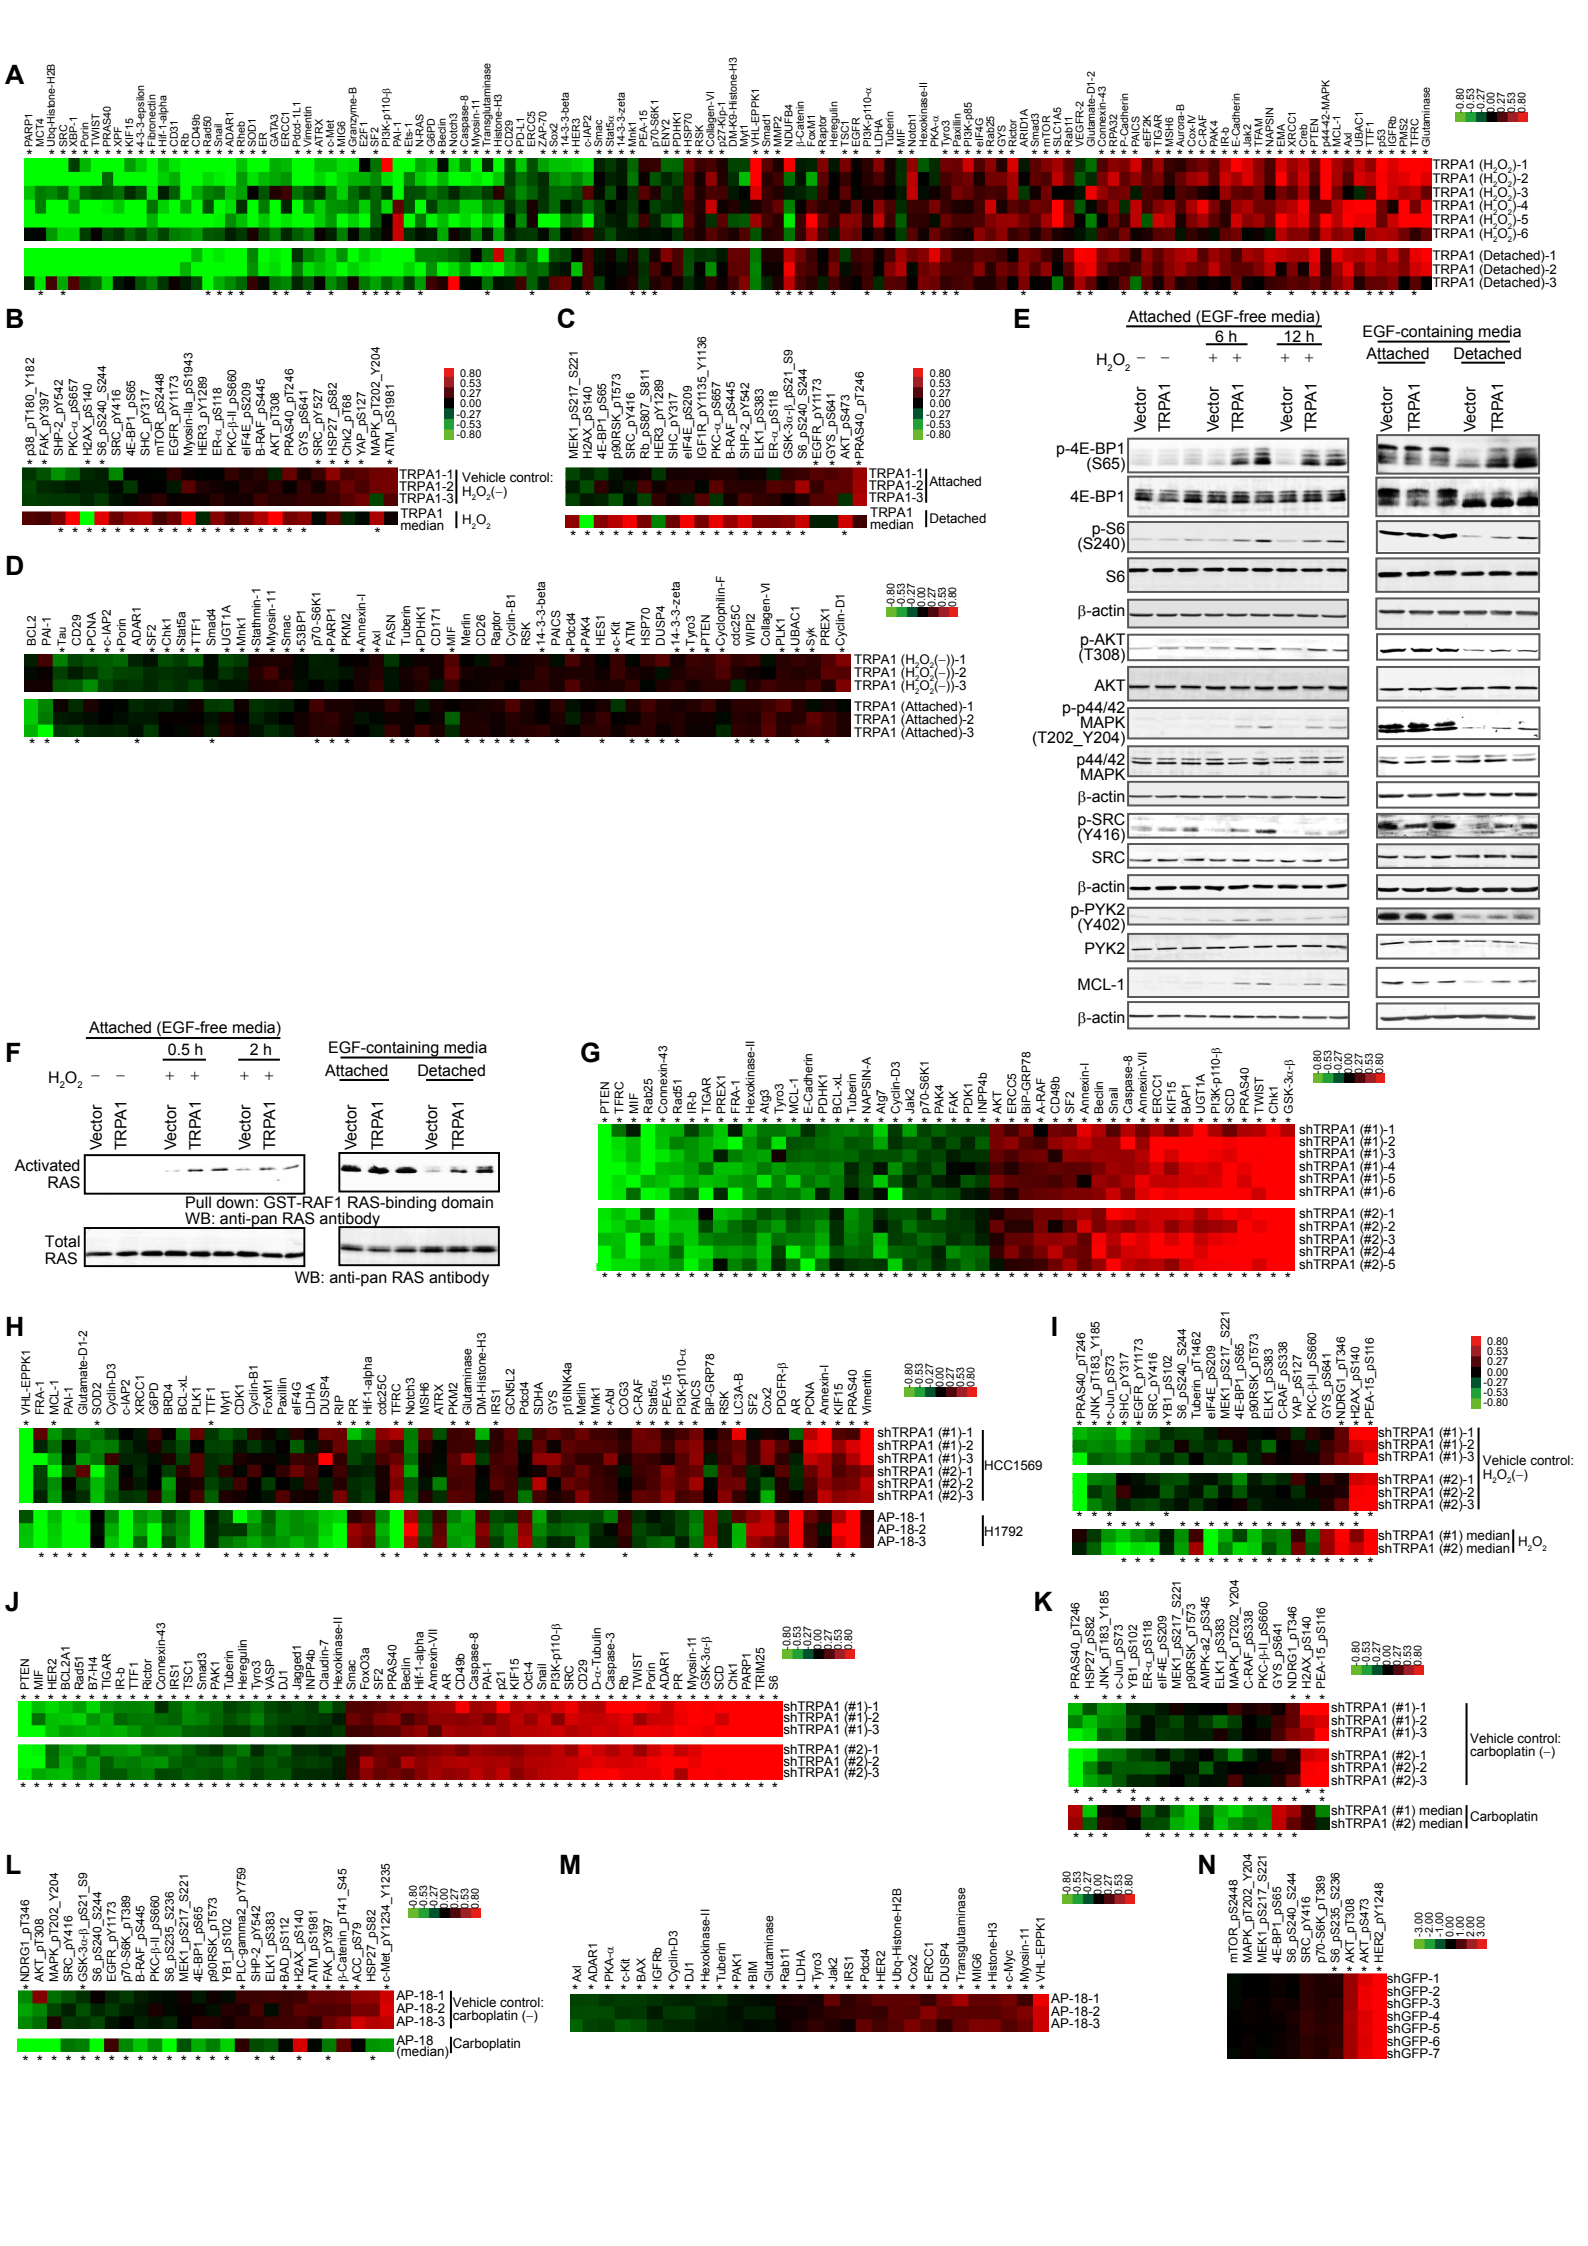



**Figure S6. RPPA Analysis Reveals Signaling Pathway Alterations Induced by TRPA1 under Oxidative Stress or Carboplatin Treatment, Related to Figure 6.**

**(A)** Heatmap of proteins whose expression was statistically significantly changed ( $*p < 0.05$ ) between TRPA1- and vector-transduced MCF-10A cells, either in  $H_2O_2$  treatment or in suspension (detached). Lysates of cells treated as in Figure 6A were analyzed by RPPA. Samples normalized to vector control.

**(B)** Heatmap of statistically significantly changed phosphorylated proteins ( $*p < 0.05$ ) between TRPA1- and vector-transduced MCF-10A cells, either in  $H_2O_2$  treatment or in its vehicle treatment. Cells were treated with  $100 \mu M H_2O_2$  or its vehicle for 24 hr. Samples normalized to vector.

**(C)** Heatmap of statistically significantly changed phosphorylated proteins ( $*p < 0.05$ ) between TRPA1- and vector-transduced MCF-10A cells, either in attachment or in detachment. Cells were cultured in adherent or non-adherent plates for 24 hr. Samples normalized to vector.

**(D)** Heatmap of proteins whose expression was statistically significantly changed ( $*p < 0.05$ ) between TRPA1- and vector-transduced MCF-10A cells, either in vehicle control for  $H_2O_2$  treatment or in attachment (control for detachment). Samples normalized to vector.

**(E and F)** The uncropped blots for Figure 6C (E) and 6D (F).

**(G)** Heatmap of proteins whose expression was statistically significantly changed ( $*p < 0.05$ ) between shTRPA1 (#1 and #2)- and shGFP-transduced HCC1569 cells treated with  $10 \mu M H_2O_2$  for 24 hr. Samples normalized to shGFP.

**(H)** Heatmap of proteins whose expression was statistically significantly changed ( $*p < 0.05$ ), either between shTRPA1(#1 and #2)- and shGFP-transduced HCC1569 cells or between AP-18-treated and AP-18-untreated H1792 cells. Cells were treated with  $10 \mu M$  carboplatin for 24 hr in the presence or absence of  $10 \mu M$  AP-18. Samples normalized to shGFP for HCC1569 cells and AP-18 (-) for H1792 cells.

**(I)** Heatmap of statistically significantly changed phosphorylated proteins ( $*p < 0.05$ ) between shTRPA1 (#1 and #2)- and shGFP-transduced HCC1569 cells, either in  $H_2O_2$  treatment or in its vehicle treatment. Cells were treated with  $10 \mu M H_2O_2$  or its vehicle for 24 hr. Samples normalized to shGFP.

**(J)** Heatmap of proteins whose expression was statistically significantly changed ( $*p < 0.05$ ) between shTRPA1 (#1 and #2)- and shGFP-transduced HCC1569 cells treated with vehicle for  $H_2O_2$  treatment. Samples normalized to shGFP.

**(K)** Heatmap of statistically significantly changed phosphorylated proteins ( $*p < 0.05$ ) between shTRPA1(#1 and #2)- and shGFP-transduced HCC1569 cells, either in carboplatin treatment or in its vehicle treatment. Cells were treated with  $10 \mu M$  carboplatin or its vehicle for 24 hr. Samples normalized to shGFP.

**(L)** Heatmap of statistically significantly changed phosphorylated proteins ( $*p < 0.05$ ) between AP-18-treated and AP-18-untreated H1792 cells, either in carboplatin treatment or in its vehicle treatment. Cells were treated with  $10 \mu M$  carboplatin or its vehicle for 24 hr in the presence or absence of  $10 \mu M$  AP-18. Samples normalized to AP-18 (-).

**(M)** Heatmap of proteins whose expression was statistically significantly changed ( $*p < 0.05$ ) between AP-18-treated and AP-18-untreated H1792 cells. Cells were treated with vehicle for carboplatin for 24 hr in the presence or absence of  $10 \mu M$  AP-18. Samples normalized to AP-18 (-).

**(N)** Heatmap of RAS-ERK, AKT, and mTOR signaling proteins in shGFP-transduced HCC1569 cells treated with  $10 \mu M H_2O_2$  for 24 hr. Samples normalized to TRPA1-expressing MCF-10A cells treated with  $100 \mu M H_2O_2$  for 24 hr.  $*p < 0.05$  compared between HCC1569 and MCF-10A cells (Student's *t* test).

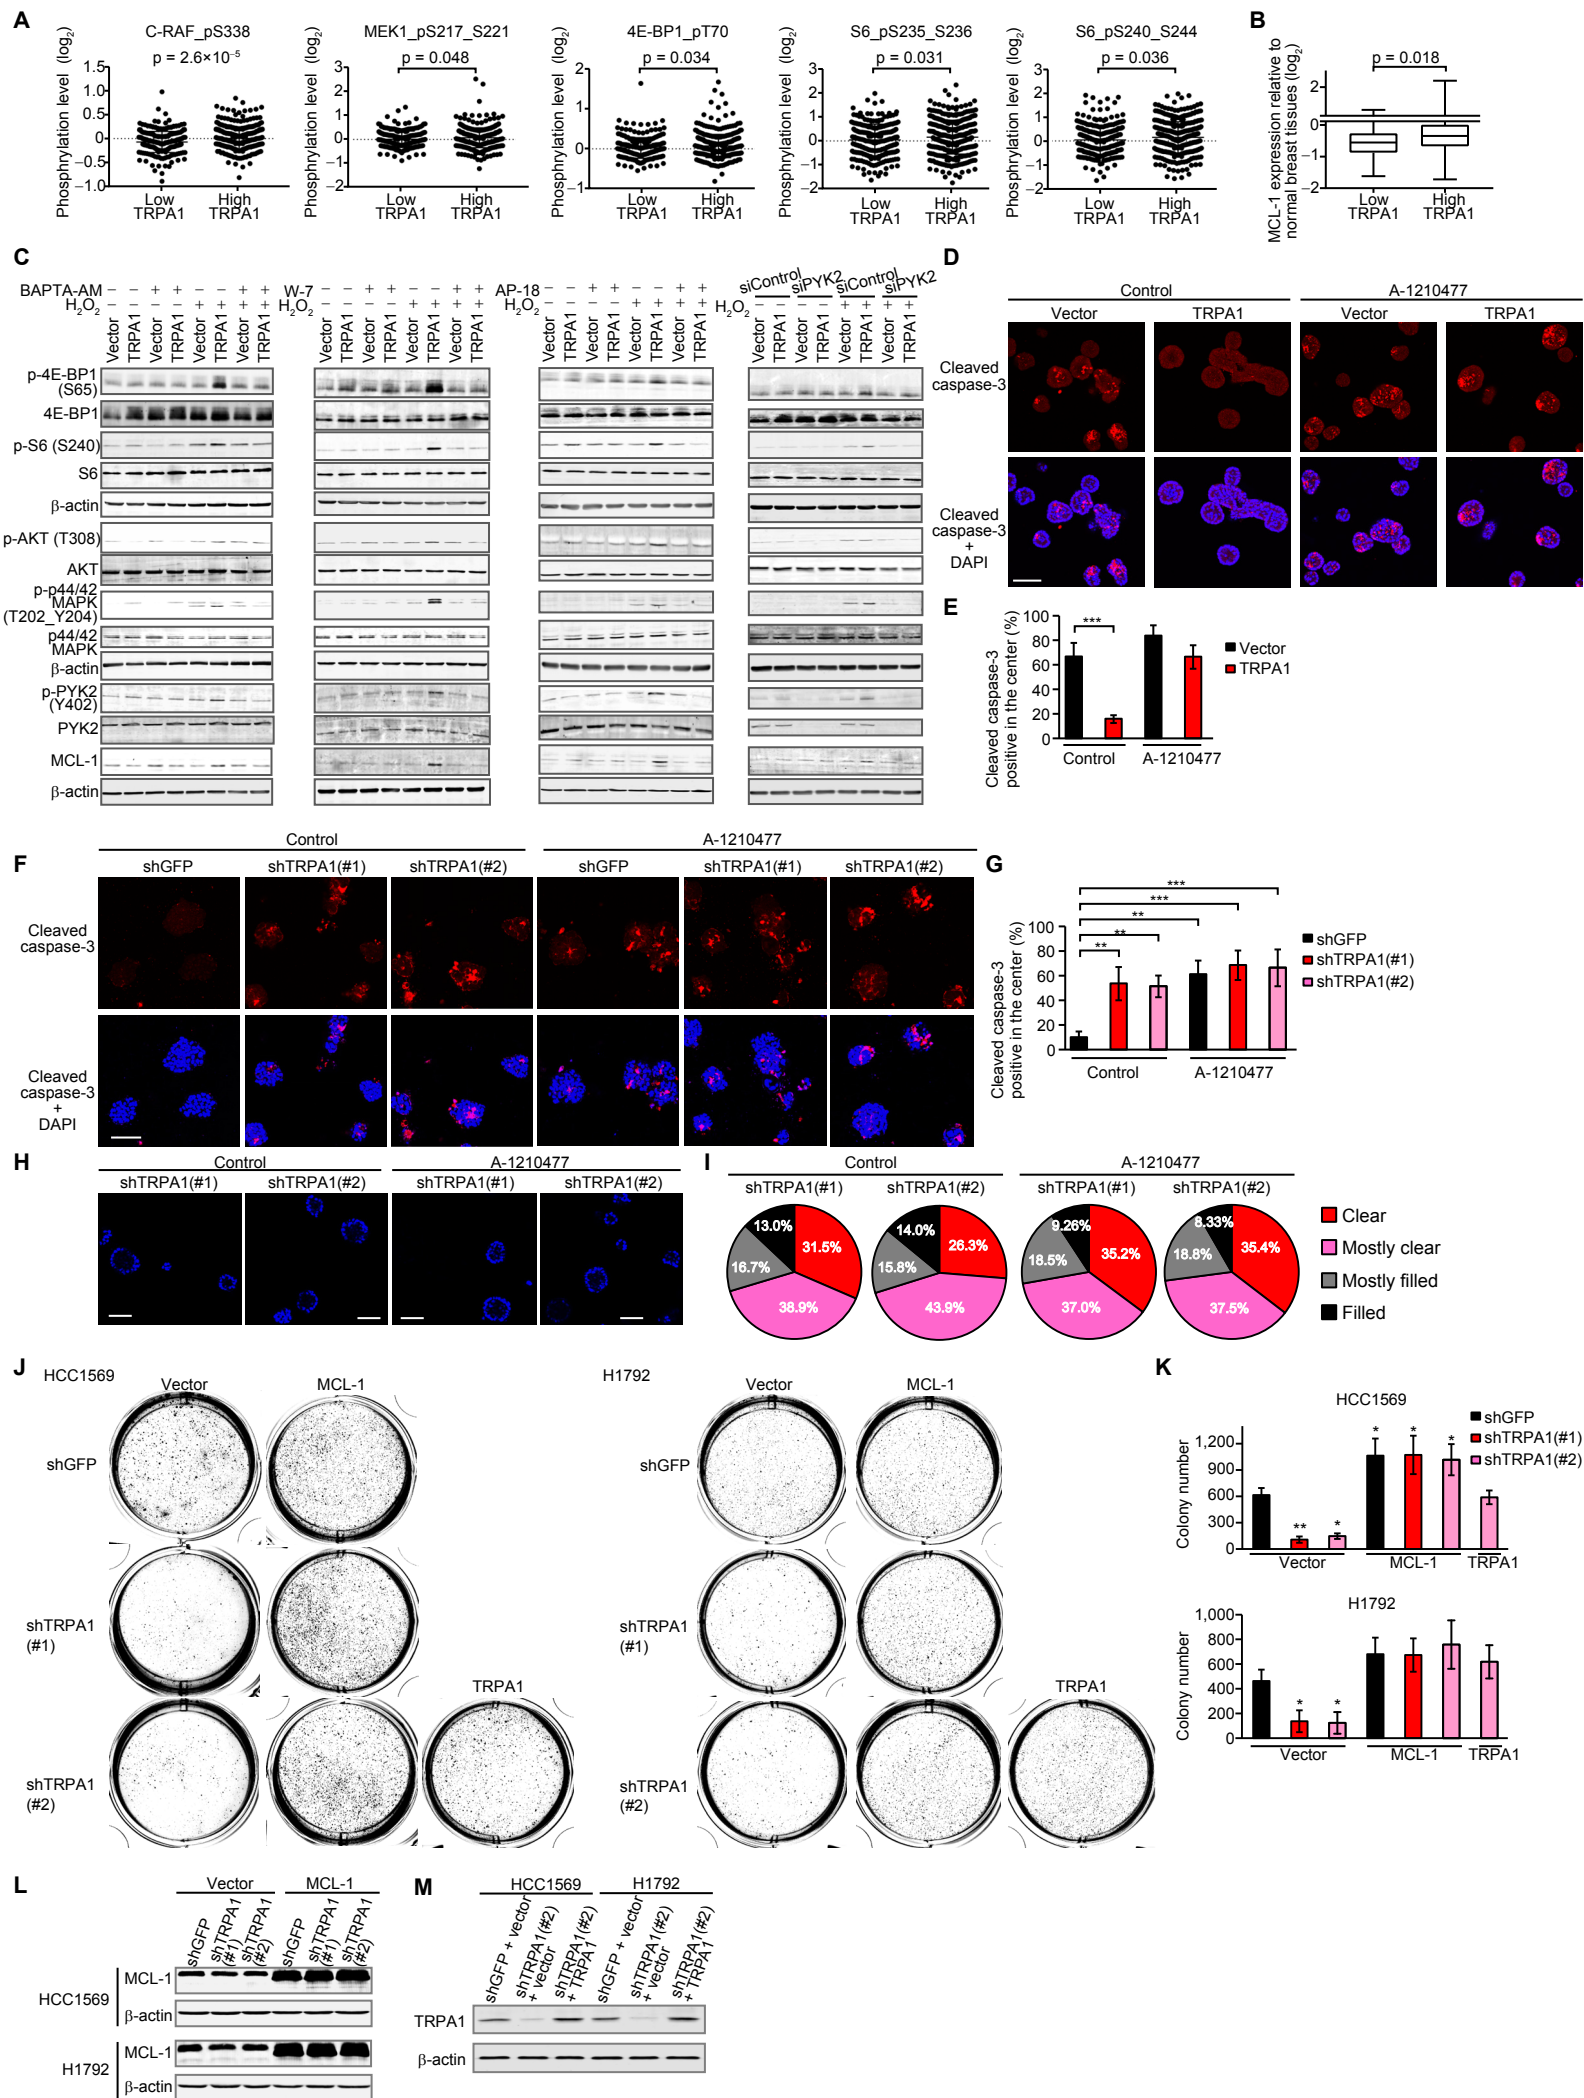

**Figure S7. TRPA1 Mediates Oxidative-Stress Defense through Upregulation of Anti-Apoptotic Programs Involving MCL-1, Related to Figure 6.**

(A) Phosphorylation levels of the indicated proteins in TCGA BRCA with low (percentile: < 0.4, n = 256) or high TRPA1 mRNA levels (percentile: > 0.4, n = 384). Statistical significance was determined by the Student's t test.

(B) Box plots displaying MCL-1 mRNA levels relative to normal breast tissues in TCGA BRCA with low (percentile: < 0.18, n = 104) or high TRPA1 mRNA levels (percentile: > 0.18, n = 474). Statistical significance was determined by the Student's t test.

(C) Immunoblot analysis of the effect of 10  $\mu$ M BAPTA-AM, 1  $\mu$ M W-7, 10  $\mu$ M AP-18, and siPYK2 on the indicated proteins in TRPA1- and vector-transduced MCF-10A cells treated with or without 100  $\mu$ M H<sub>2</sub>O<sub>2</sub> for 12 hr in the absence of EGF in monolayer culture.

(D) Representative images of day-8 TRPA1- or vector-transduced MCF-10A acini treated with or without 3  $\mu$ M A-1210477. The spheroids were stained with cleaved caspase-3 and DAPI. Scale bar 100  $\mu$ m.

(E) Percentage of day-8 TRPA1- or vector-transduced MCF-10A acini with cleaved caspase-3 staining in the center. The spheroids were treated with or without 3  $\mu$ M A-1210477. Data shown as mean  $\pm$  SD from three independent experiments. \*\*\*p < 0.001 (one-way ANOVA).

(F) Representative images of day-10 HCC1569 spheroids treated with or without 3  $\mu$ M A-1210477. The spheroids were stained with cleaved caspase-3 and DAPI. Scale bar 100  $\mu$ m.

(G) Percentage of day-10 HCC1569 spheroids with cleaved caspase-3 staining in the center. The spheroids were treated with or without 3  $\mu$ M A-1210477. Data shown as mean  $\pm$  SD from three independent experiments. \*\*p < 0.01 and \*\*\*p < 0.001 (one-way ANOVA).

(H) Representative images of day-13 HCC1569 transduced with shTRPA1 (#1) or shTRPA1 (#2). The spheroids were treated with or without 3  $\mu$ M A-1210477 and stained with DAPI. Scale bar 100  $\mu$ m.

(I) Pie chart of clearance levels of Day-13 HCC1569 transduced with shTRPA1 (#1) (n = 54 for control and n = 54 for A-1210477: the sum of two independent experiments) or shTRPA1 (#2) (n = 57 for control and n = 48 for A-1210477: the sum of two independent experiments). The spheroids treated with or without 3  $\mu$ M A-1210477.

(J and K) The indicated HCC1569 or H1792 cells were grown in soft agar, and after 18 days, images were taken after iodonitrotetrazolium chloride staining (J). Colony numbers are also shown (K). Data represent mean  $\pm$  SD of three independent experiments. \*p < 0.05 and \*\*p < 0.01 compared to cells transduced with both shGFP and an empty lentiviral vector (one-way ANOVA).

(L and M) Immunoblot of lysates from the indicated HCC1569 or H1792 cells transduced with an empty lentiviral vector, TRPA1, or MCL-1.

In (A) and (B), box and whiskers graphs indicate the median and the 25<sup>th</sup> and 75<sup>th</sup> percentiles, with minimum and maximum values at the extremes of the whiskers. In (C), (L), and (M), blots are representative of at least two independent experiments.

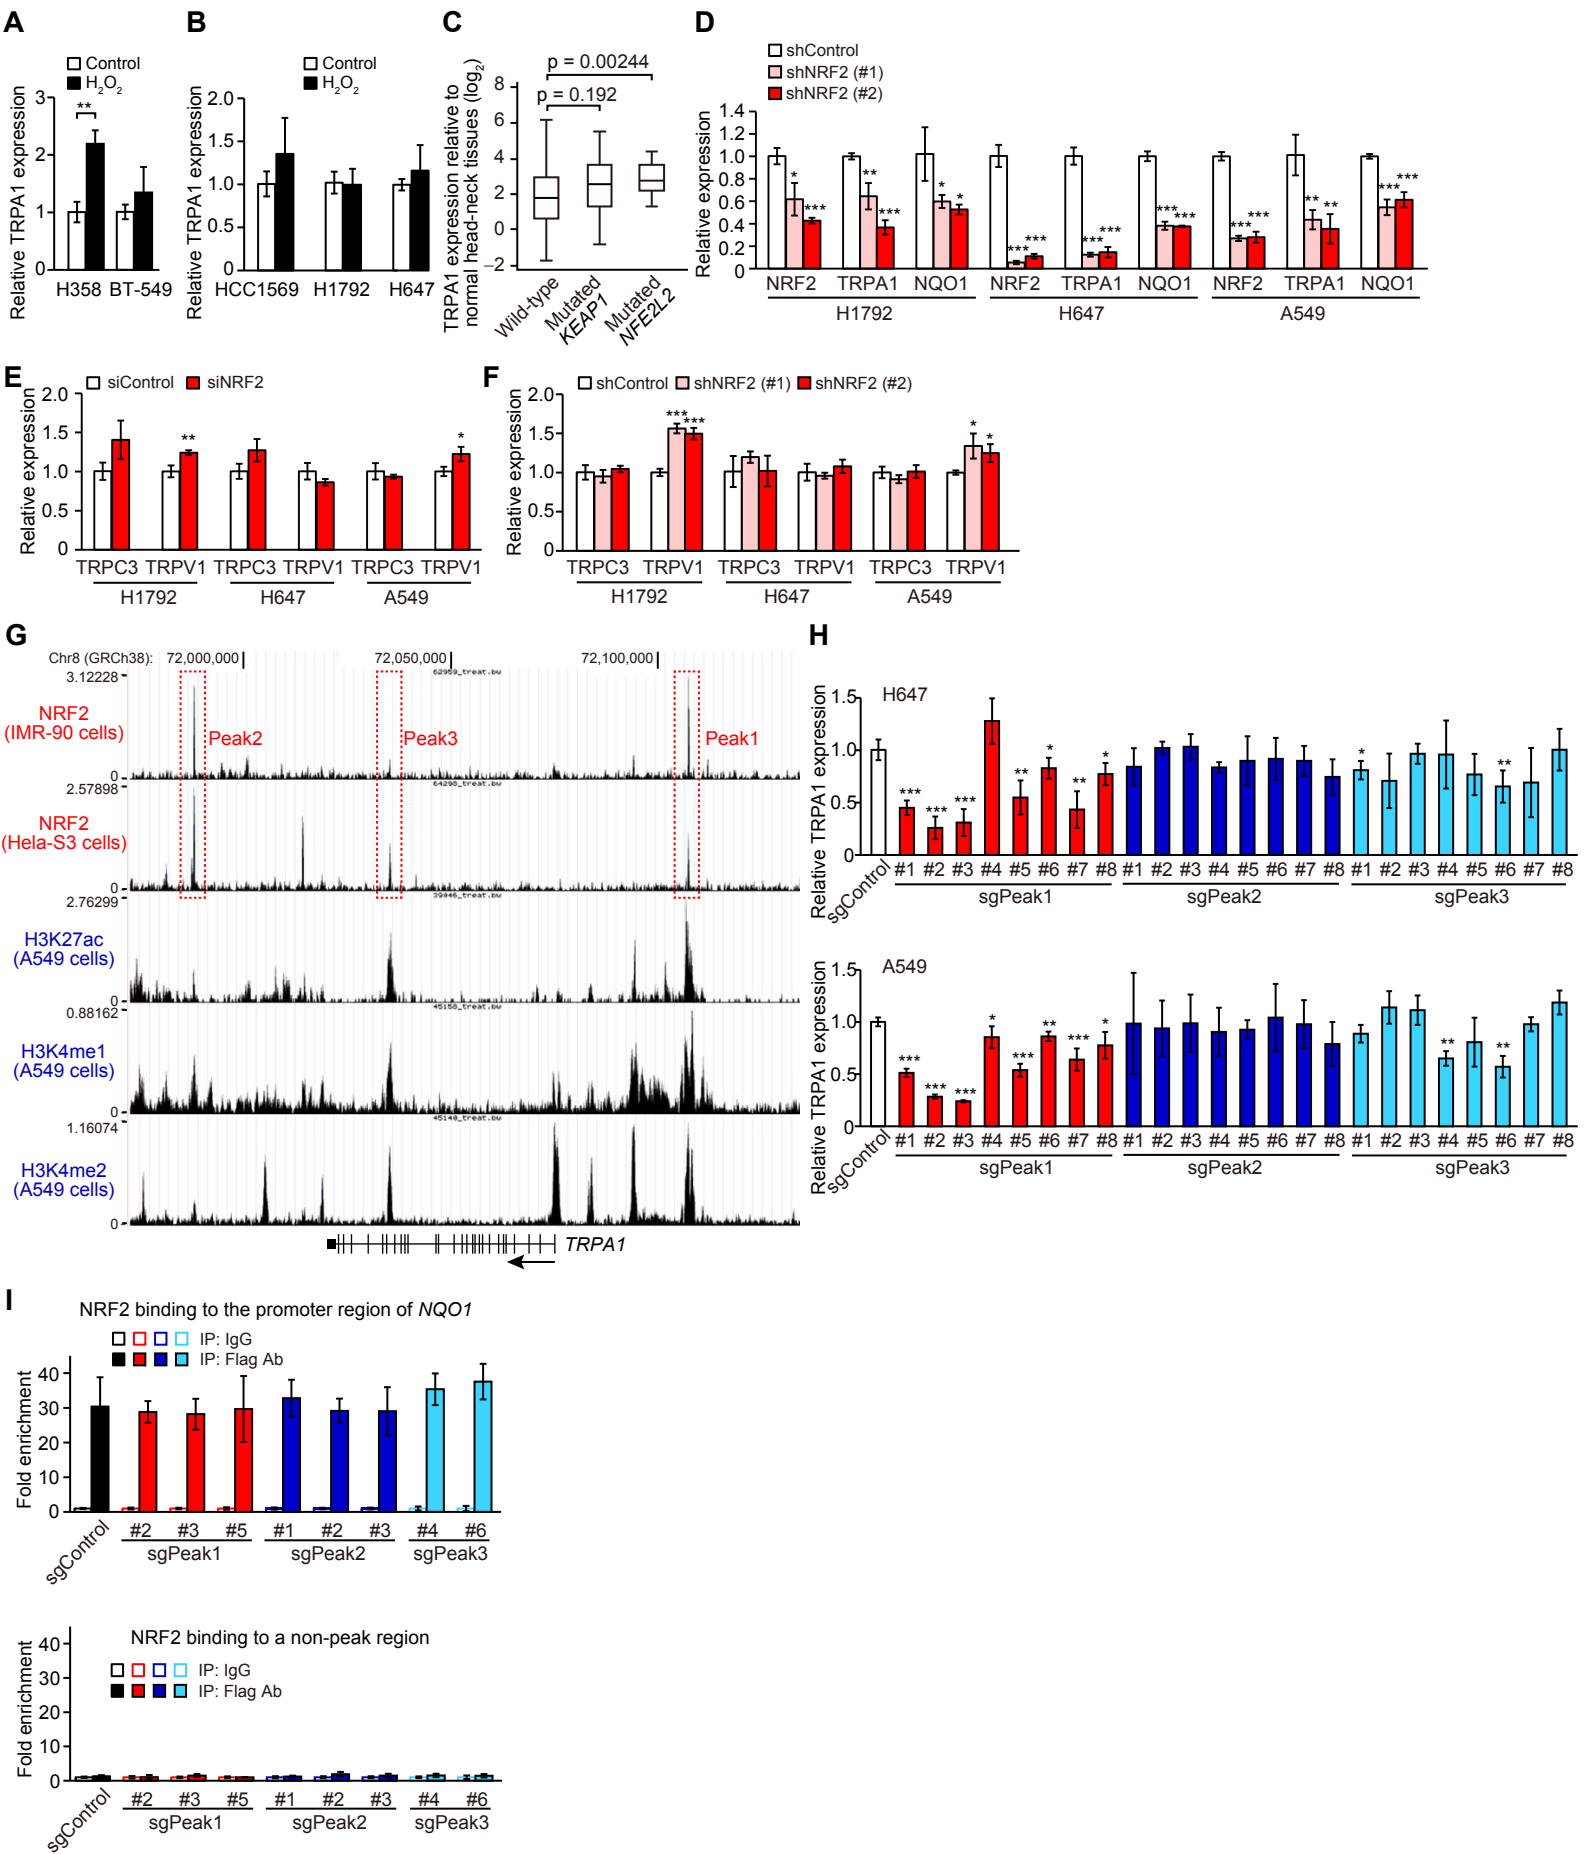

**Figure S8. NRF2 Directly Induces TRPA1 Expression in Cancer Cells, Related to Figure 7.**

**(A)** mRNA expression of TRPA1 in H358 or BT-549 cells treated with or without 10  $\mu\text{M}$   $\text{H}_2\text{O}_2$  for 48 hr in serum-containing complete media (i.e. 10% FBS-containing media). Data were normalized to vehicle control. Data shown as mean  $\pm$  SD of three independent experiments. \*\* $p < 0.01$  (Student' s t test).

**(B)** mRNA expression of TRPA1 in HCC1569, H1792, or H647 cells treated with or without 10  $\mu\text{M}$   $\text{H}_2\text{O}_2$  for 48 hr in serum-starved conditions (0.1% FBS). Data were normalized to vehicle control. Data shown as mean  $\pm$  SD of three independent experiments.

**(C)** Box plots displaying TRPA1 mRNA levels relative to normal head-neck tissues in wild-type ( $n = 249$ ) and *KEAPI-* ( $n = 13$ ) or *NFE2L2*-mutated HNSC ( $n = 17$ ) based on TCGA dataset. Box and whiskers graphs indicate the median and the 25<sup>th</sup> and 75<sup>th</sup> percentiles, with minimum and maximum values at the extremes of the whiskers. Statistical significance was determined by the Student' s t test.

**(D)** mRNA expression of NRF2, TRPA1, and NQO1 in the indicated cancer cells transduced with doxycycline-inducible shControl or shNRF2. Cells were treated with 1  $\mu\text{g}/\text{ml}$  doxycycline for 48 hr. Data were normalized to shControl. Data shown as mean  $\pm$  SD of three independent experiments. \* $p < 0.05$ , \*\* $p < 0.01$ , and \*\*\* $p < 0.001$  compared to shControl (Student' s t test).

**(E)** mRNA expression of TRPC3 and TRPV1 in the indicated cancer cells transfected with siControl or siNRF2. Data were normalized to siControl. Data shown as mean  $\pm$  SD of three independent experiments. \* $p < 0.05$  and \*\* $p < 0.01$  compared to siControl (Student' s t test).

**(F)** mRNA expression of TRPC3 and TRPV1 in the indicated cancer cells transduced with doxycycline-inducible shControl or shNRF2. Cells were treated with 1  $\mu\text{g}/\text{ml}$  doxycycline for 48 hr. Data were normalized to shControl. Data shown as mean  $\pm$  SD of three independent experiments. \* $p < 0.05$  and \*\*\* $p < 0.001$  compared to shControl (Student' s t test).

**(G)** Cistrome ChIP-seq data (<http://cistrome.org>) for the distribution of NRF2, histone H3K27ac, H3K4me1, and H3K36me2 are plotted around the *TRPA1* locus. The Peak1 [Chr8: 72107522–72107682 (GRCh38)], Peak2 [Chr8: 71987814–71987948 (GRCh38)], Peak3 [Chr8: 72035191–72035330 (GRCh38)].

**(H)** mRNA expression of TRPA1 in H647 or A549 cells transduced with Cas9 plus sgControl, sgPeak1, sgPeak2, or sgPeak3. Data were normalized to sgControl. Data shown as mean  $\pm$  SD of three independent experiments. \* $p < 0.05$ , \*\* $p < 0.01$ , and \*\*\* $p < 0.001$  compared to sgControl (Student' s t test).

**(I)** Chromatin immunoprecipitation with Flag antibody of the fragmented chromatin containing the promoter of *NQO1* [Chr16: 69727000–69727111 (GRCh38)] or non-Peak region [Chr8: 72086158–72086422 (GRCh38)] in Flag-NRF2-overexpressing H1792 cells transduced with Cas9 plus sgControl, sgPeak1, sgPeak2, or sgPeak3. Binding was normalized to that in immunoprecipitation with IgG control. Data shown as mean  $\pm$  SD of three independent experiments.



**Table S3. Expression levels of classical NRF2-induced genes in tumors with low (below median) or high TRPA1 mRNA (above median) from TCGA BRCA, LUSC, or LUAD, related to Figure 7.**

|         | BRCA (n = 578)                                                   |                           |                             | LUSC (n = 501)                                                 |                           |                             | LUAD (n = 517)                                                 |                           |                             |
|---------|------------------------------------------------------------------|---------------------------|-----------------------------|----------------------------------------------------------------|---------------------------|-----------------------------|----------------------------------------------------------------|---------------------------|-----------------------------|
|         | mRNA level relative to normal breast tissues (log <sub>2</sub> ) |                           | p value (low vs high TRPA1) | mRNA level relative to normal lung tissues (log <sub>2</sub> ) |                           | p value (low vs high TRPA1) | mRNA level relative to normal lung tissues (log <sub>2</sub> ) |                           | p value (low vs high TRPA1) |
|         | In tumors with low TRPA1                                         | In tumors with high TRPA1 |                             | In tumors with low TRPA1                                       | In tumors with high TRPA1 |                             | In tumors with low TRPA1                                       | In tumors with high TRPA1 |                             |
| ABCC3   | -0.715                                                           | -0.448                    | 0.0347                      | -0.706                                                         | -0.374                    | 0.0371                      | 2.47                                                           | 1.90                      | 1.08×10 <sup>-5</sup>       |
| GCLC    | -0.323                                                           | -0.352                    | 0.613                       | 2.69                                                           | 2.77                      | 0.553                       | 0.884                                                          | 1.62                      | 1.21×10 <sup>-5</sup>       |
| GCLM    | -0.406                                                           | -0.256                    | 0.0122                      | 1.43                                                           | 2.02                      | 3.55×10 <sup>-5</sup>       | 0.620                                                          | 0.976                     | 0.000292                    |
| GLS     | -0.469                                                           | -0.295                    | 0.0164                      | -0.997                                                         | -0.790                    | 0.00204                     | -0.398                                                         | -0.155                    | 0.0243                      |
| GSR     | 0.541                                                            | 0.599                     | 0.511                       | 0.755                                                          | 1.05                      | 0.00660                     | 0.652                                                          | 0.676                     | 0.801                       |
| HMOX1   | 0.568                                                            | 0.794                     | 0.00544                     | -1.08                                                          | -0.95                     | 0.259                       | -0.814                                                         | -0.627                    | 0.0286                      |
| KEAP1   | 0.325                                                            | 0.235                     | 0.0520                      | 0.690                                                          | 0.864                     | 0.00624                     | 0.114                                                          | -0.00171                  | 0.0308                      |
| MAFG    | -0.502                                                           | -0.378                    | 0.0263                      | 0.181                                                          | 0.431                     | 0.00105                     | -0.150                                                         | -0.0201                   | 0.0257                      |
| NRF2    | -0.586                                                           | -0.448                    | 0.000414                    | 0.685                                                          | 0.511                     | 0.0438                      | -0.473                                                         | -0.537                    | 0.126                       |
| NQO1    | 0.422                                                            | 0.461                     | 0.738                       | 1.41                                                           | 1.89                      | 0.0132                      | 2.48                                                           | 2.34                      | 0.347                       |
| SLC7A11 | 1.239                                                            | 1.69                      | 0.000191                    | 2.93                                                           | 3.45                      | 0.0100                      | 2.11                                                           | 2.65                      | 0.00296                     |
| TXN     | 0.794                                                            | 0.965                     | 0.00270                     | 1.26                                                           | 1.52                      | 0.0105                      | 0.875                                                          | 0.912                     | 0.631                       |
| TXNRD1  | 0.130                                                            | 0.290                     | 0.0113                      | 0.649                                                          | 1.12                      | 0.000718                    | 0.575                                                          | 1.18                      | 3.91×10 <sup>-5</sup>       |

**Table S4. Primer sequences used for the construction of lentiCRISPR plasmids, related to STAR Methods.**

| Plasmid ID | Mutation primer sequence (5' → 3') |                            |
|------------|------------------------------------|----------------------------|
|            | Forward primer                     | Reverse primer             |
| sgPeak1 #1 | caccgTGAGTCATCATTGCGGAAGT          | aaacACTTCCGCAATGATGACTCAc  |
| sgPeak1 #2 | caccgACTTCCGCAATGATGACTCA          | aaacTGAGTCATCATTGCGGAAGTc  |
| sgPeak1 #3 | caccgAACTTCCGCAATGATGACTC          | aaacGAGTCATCATTGCGGAAGTtc  |
| sgPeak1 #4 | caccgGAAGCCCTGAGTCATCATTG          | aaacCAATGATGACTCAGGGCTTCc  |
| sgPeak1 #5 | caccgAGGACCTCTATTTATTCAGC          | aaacGCTGAATAAATAGAGGTCCTc  |
| sgPeak1 #6 | caccgATGGTGGAAATTTGTGTTACT         | aaacAGTAACACAAATTCACCATc   |
| sgPeak1 #7 | caccgTACCATAAAGGTTTACTAAT          | aaacATTAGTAAACCTTTATGGTAc  |
| sgPeak1 #8 | caccgCCACTGTATTTCAAAGCTT           | aaacAAGCTTTTGAATACAGTGGc   |
| sgPeak2 #1 | caccgTAAGAGCTGAATGGTAGCAC          | aaacGTGCTACCATTACAGCTCTTAc |
| sgPeak2 #2 | caccgTTGAACTCAGGCATAGTGCT          | aaacAGCACTATGCCTGAGTTCAAc  |
| sgPeak2 #3 | caccgAAGAGCTGAATGGTAGCACA          | aaacTGTGCTACCATTACAGCTCTTc |
| sgPeak2 #4 | caccgAGTGGGGCAGAAGTTTGGAC          | aaacGTCCAACTTCTGCCCACTc    |
| sgPeak2 #5 | caccgGAGAGAATGACTCAGCAGAT          | aaacATCTGCTGAGTCATTCTCTCc  |
| sgPeak2 #6 | caccgTTGGACTGGTAAGAGCTGAA          | aaacTTCAGCTCTTACCAGTCCAAC  |
| sgPeak2 #7 | caccgGAATGGTAGCACAGGGCAGC          | aaacGCTGCCCTGTGCTACCATTCC  |
| sgPeak2 #8 | caccgAGAGAGAATGACTCAGCAGA          | aaacTCTGCTGAGTCATTCTCTCTc  |
| sgPeak3 #1 | caccgTTCAGGCACTGTCACACCCT          | aaacAGGGTGTGACAGTGCCTGAAc  |
| sgPeak3 #2 | caccgATAGGATTTAAGACAGGTTT          | aaacGAACCTGTCTTAAATCCTATc  |
| sgPeak3 #3 | caccgCTTGGCTCTGTATTATTAG           | aaacCTAATAATGACAGAGCCAAGc  |
| sgPeak3 #4 | caccgACATATATAGTACTCAGCA           | aaacTGCTGAGTCACTATATATGTc  |
| sgPeak3 #5 | caccgCACTAATAATGACAGAGCCA          | aaacTGGCTCTGTATTATTAGTGC   |
| sgPeak3 #6 | caccgACTAATAATGACAGAGCCAA          | aaacTTGGCTCTGTATTATTAGTc   |
| sgPeak3 #7 | caccgTACAAGATTCTAAAGCTGAA          | aaacTTCAGCTTTAGAATCTTGTAc  |
| sgPeak3 #8 | caccgTAATAAGTCATCTTTGTCAA          | aaacTTGACAAAGATGACTTATTAc  |

**Table S5. Primer sequences used for quantitative PCR, related to STAR Methods.**

Quantitative RT-PCR primers

|         | Primer sequence (5' → 3') |                          |
|---------|---------------------------|--------------------------|
|         | Forward primer            | Reverse primer           |
| TRPA1   | ATCAGAAATCCACCATCGTG      | TTGACTGCTCTCAACACAGTATTC |
| TRPC3   | TTCCTGGCCATTGGCTACT       | AAAAGGGCTTCGCAGAATTT     |
| TRPV1   | AGAGTCACGCTGGCAACC        | CGGCAGAGACTCTCCATCAC     |
| NRF2    | GAGAGCCCAGTCTTCATTGC      | TTGGCTTCTGGACTTGGAAC     |
| NQO1    | TGAAGAAGAAAGGATGGGAGGT    | GGCCTTCTTTATAAGCCAGAACA  |
| GCLM    | CTCCTGCTGTGTGATGCCA       | CTCGTGCGCTTGAATGTCAG     |
| β-Actin | GACAGGATGCAGAAGGAGATC     | TGCTGATCCACATCTGCTG      |

ChIP primers

|                 | Primer sequence (5' → 3') |                           |
|-----------------|---------------------------|---------------------------|
|                 | Forward primer            | Reverse primer            |
| Peak1 region    | ATGTTTATTGCTGTGGTTTGAG    | CTTCCGCAATGATGACTCAG      |
| Peak2 region    | AAGTGAGAGCCAGACAGTCC      | GGAATTGAGAAGAGAAGACAGATTG |
| Peak3 region    | CCCAGAAATAGGATTTAAGACAGG  | AGGAACTTACAAGATTCTAAAGCTG |
| non-Peak region | GTGTACAGAATGCGGAAAAC      | CCCAAAGTGCTAGGATTACAG     |
| NQO1 promoter   | AAGTGCAGAATCTGAATCTTG     | AGATTCTGCTGAGTCACTGTG     |
